# Supplementary material for: Activation of Wnt/β-Catenin in Ewing Sarcoma Cells Antagonizes EWS/ETS Function and Promotes Phenotypic Transition to More Metastatic Cell States
Source: Oxford University Press journal article supplement (doi:10.1158/0008-5472.can-15-3422), 2016-06-30
Supplement: 00085472can153422-sup-159677_1_supp_3515783_j7jjxd.xlsx [file 00085472can153422-sup-159677_1_supp_3515783_j7jjxd.xlsx]

## Sheet: Sheet1
Supplementary Table S1A. Wnt3a modulated genes					Supplementary Table S1B. Wnt3a+RSPO2 modulated genes
Transcript ID	Hgnc symbol	Log fold change	P value		Transcript ID	Hgnc symbol	Log fold change	P value
ENST00000394153	FHL1	6.42231	2.22e-07		ENST00000510508	DIO3	6.08632	1.71e-27
ENST00000509613	FAM156B	5.98377	7.76e-05		ENST00000394153	FHL1	5.68676	1.42e-05
ENST00000590720	PSME3	5.68074	2.09e-07		ENST00000361478	PJA1	5.47078	1.99e-06
ENST00000361478	PJA1	5.22276	1.25e-05		ENST00000440284	ACSM3	5.34146	4.33e-06
ENST00000510508	DIO3	5.00805	1.49e-17		ENST00000509613	FAM156B	5.28451	0.000633112
ENST00000347206	C11orf74	4.84075	0.000118207		ENST00000590720	PSME3	4.7851	0.000165422
ENST00000357549	HIST1H4K	4.76078	0.000183484		ENST00000585089	IFT20	4.44226	0.00166834
ENST00000585089	IFT20	4.61859	0.000854923		ENST00000397137	BLCAP	4.41876	0.00191243
ENST00000413844	ELOVL1	4.50037	0.00143818		ENST00000436066	PLEKHF1	4.41243	0.000994944
ENST00000411651	SUMO3	3.99058	0.0069072		ENST00000397517	STK24	4.36896	0.00144941
ENST00000436066	PLEKHF1	3.83751	0.00759766		ENST00000429473	GNGT1	4.36218	6.53e-05
ENST00000274368	CRHBP	3.83215	8.69e-05		ENST00000274368	CRHBP	4.32242	1.52e-06
ENST00000444704	ING4	3.77599	0.00908483		ENST00000391588	KRTAP3-1	4.3109	0.000206168
ENST00000397517	STK24	3.77432	0.00993385		ENST00000373068	SLC25A25	4.16383	0.00114459
ENST00000429473	GNGT1	3.73661	0.000827517		ENST00000413844	ELOVL1	4.04422	0.00614419
ENST00000391588	KRTAP3-1	3.70382	0.00248569		ENST00000222543	TFPI2	4.00558	1.25e-07
ENST00000367315	TNNT2	3.69536	2.34e-06		ENST00000367315	TNNT2	3.99587	1.4e-07
ENST00000399409	RABGGTA	3.67417	0.0120343		ENST00000399409	RABGGTA	3.95423	0.00539182
ENST00000397137	BLCAP	3.66892	0.0156874		ENST00000378615	C11orf49	3.94458	0.00555915
ENST00000440284	ACSM3	3.65863	0.0125425		ENST00000344257	GAD1	3.77806	0.00124238
ENST00000588740	CCDC106	3.64521	0.000140502		ENST00000373970	DKK1	3.76515	0.000170813
ENST00000373068	SLC25A25	3.57598	0.00826231		ENST00000395353	MVP	3.70649	0.00148037
ENST00000279804	CTF1	3.57465	0.00474363		ENST00000592872	C19orf25	3.69942	0.0113918
ENST00000352867	BTN2A2	3.54424	0.016805		ENST00000268459	NKD1	3.68566	7.82e-09
ENST00000425478	NKIRAS1	3.52536	0.017602		ENST00000411651	SUMO3	3.64023	0.0168588
ENST00000526094	UBTF	3.50456	0.0185125		ENST00000438313	LEF1	3.57871	1.19e-05
ENST00000373130	STK40	3.39811	0.0203856		ENST00000397853	NDRG2	3.57851	0.0156174
ENST00000395741	PPP6R2	3.34443	0.00987378		ENST00000586686	RPS15	3.57839	0.0127966
ENST00000586686	RPS15	3.33115	0.0239869		ENST00000379951	LEF1	3.53132	3e-07
ENST00000592872	C19orf25	3.29718	0.0295962		ENST00000215956	NHP2L1	3.5085	4.9e-05
ENST00000378615	C11orf49	3.21194	0.0353056		ENST00000323851	NDRG1	3.47334	0.0201717
ENST00000438313	LEF1	3.17875	0.000271478		ENST00000279804	CTF1	3.40491	0.00879658
ENST00000543795	MVB12A	3.16549	2.37e-06		ENST00000350763	TNC	3.39427	4.86e-05
ENST00000310144	PSMC5	3.16153	0.0228243		ENST00000376368	WDR45	3.37012	0.000850934
ENST00000397853	NDRG2	3.15712	0.0393624		ENST00000526094	UBTF	3.35573	0.0263532
ENST00000397267	SLC22A17	3.15567	0.000144773		ENST00000338415	QPCT	3.32658	0.00153671
ENST00000438103	SBNO2	3.15061	0.00542188		ENST00000425478	NKIRAS1	3.31044	0.0290649
ENST00000376368	WDR45	3.14346	0.0025578		ENST00000367324	PKP1	3.29082	0.00144222
ENST00000322813	FAM214B	3.11728	0.00609802		ENST00000373130	STK40	3.23845	0.0301388
ENST00000229471	FYN	3.10824	0.004361		ENST00000357549	HIST1H4K	3.20815	0.0359146
ENST00000323851	NDRG1	3.09845	0.0440502		ENST00000219454	WFDC1	3.18624	1.22e-07
ENST00000222543	TFPI2	3.01503	0.000512503		ENST00000444704	ING4	3.18165	0.0378591
ENST00000393775	IGSF11	2.97784	0.03143		ENST00000374734	CREM	3.12328	0.00282188
ENST00000373970	DKK1	2.94886	0.00858839		ENST00000382263	TNFRSF19	3.10551	0.00397733
ENST00000432087	HJURP	2.83765	0.00792625		ENST00000393925	PHLDB2	3.05936	2.89e-06
ENST00000553379	HOPX	2.75467	0.031732		ENST00000588740	CCDC106	3.03355	0.00421565
ENST00000301068	RHEBL1	2.75283	0.0370574		ENST00000300441	ACSF2	3.0269	2.97e-05
ENST00000539065	2014-03-07	2.73814	0.00960645		ENST00000354724	HEY1	3.01604	1.45e-07
ENST00000344257	GAD1	2.737	0.0434527		ENST00000352867	BTN2A2	3.00547	0.05267
ENST00000305798	TSPAN5	2.72278	0.00927921		ENST00000506237	SUB1	2.99009	0.00950819
ENST00000368304	LAMTOR2	2.70788	0.0162488		ENST00000264381	BCHE	2.94798	0.00109376
ENST00000379951	LEF1	2.70099	0.000666505		ENST00000432087	HJURP	2.92844	0.00555243
ENST00000412819	GSN	2.64982	0.0244569		ENST00000294794	OLFML2B	2.9179	0.0159693
ENST00000377894	TDRD3	2.60286	0.00788311		ENST00000395741	PPP6R2	2.88415	0.0368281
ENST00000563233	HYKK	2.5728	0.0256739		ENST00000412819	GSN	2.8605	0.0123991
ENST00000372393	ASS1	2.57084	0.0171241		ENST00000409197	DYNC1I2	2.84976	4.64e-05
ENST00000539261	MGP	2.5705	0.0230497		ENST00000313695	ARHGEF2	2.77797	0.00947814
ENST00000409197	DYNC1I2	2.55597	0.000427073		ENST00000368868	SELENBP1	2.69971	0.00151254
ENST00000591470	GCDH	2.51438	0.000141908		ENST00000449058	TOM1	2.6995	3.52e-05
ENST00000338415	QPCT	2.4882	0.0367205		ENST00000392351	HOMER3	2.65299	0.000329334
ENST00000579695	ORMDL3	2.48178	8.71e-05		ENST00000324170	ZCCHC10	2.64752	0.0166183
ENST00000374734	CREM	2.4696	0.0323067		ENST00000358196	GAD1	2.59254	0.039821
ENST00000397443	CPNE1	2.46373	0.000277857		ENST00000371986	POMGNT1	2.59188	0.0145557
ENST00000325006	AHCYL2	2.45377	0.0469088		ENST00000257566	TBX3	2.58809	1.79e-07
ENST00000348405	SEC31A	2.45373	0.0141086		ENST00000336708	TRIM16	2.56334	9.14e-08
ENST00000393925	PHLDB2	2.41333	0.000930103		ENST00000400256	COLEC12	2.53935	0.0147256
ENST00000356098	ARSA	2.39584	0.0167748		ENST00000372648	TBC1D13	2.53247	0.00359884
ENST00000372429	USP20	2.36975	0.00823434		ENST00000527275	SMPD1	2.49433	0.0359712
ENST00000264381	BCHE	2.35682	0.017394		ENST00000372393	ASS1	2.48282	0.0225724
ENST00000400256	COLEC12	2.35346	0.0276858		ENST00000575801	NXN	2.48161	0.000124177
ENST00000586659	KANK2	2.29553	3.23e-06		ENST00000381396	CCP110	2.48126	0.0541415
ENST00000266070	DIDO1	2.28792	0.0104453		ENST00000305798	TSPAN5	2.47654	0.0230493
ENST00000371986	POMGNT1	2.2859	0.0374777		ENST00000340852	HM13	2.47456	0.021401
ENST00000219454	WFDC1	2.27622	0.00120681		ENST00000264870	F13A1	2.45944	0.00753916
ENST00000354724	HEY1	2.26497	0.000509717		ENST00000430704	SIMC1	2.45497	0.0528093
ENST00000358358	ECHDC2	2.26002	0.0253331		ENST00000369637	RHOC	2.45269	1.41e-05
ENST00000370589	MCOLN3	2.24799	0.032584		ENST00000358807	MICAL1	2.41553	0.0026714
ENST00000368786	UROS	2.23092	0.0184012		ENST00000537971	TSPAN9	2.41453	4.13e-17
ENST00000372724	KAT6B	2.2151	0.0345415		ENST00000369208	SIM1	2.41077	0.00793235
ENST00000435064	CPSF3L	2.21452	0.000513423		ENST00000373563	GIGYF2	2.38963	0.0260034
ENST00000291281	PRKD2	2.21413	0.040052		ENST00000370589	MCOLN3	2.38149	0.0211235
ENST00000394765	UBXN6	2.19743	2.36e-05		ENST00000372429	USP20	2.37571	0.00816718
ENST00000426588	DNAJC7	2.19743	0.00734059		ENST00000342190	SUMF2	2.36925	0.00513171
ENST00000268459	NKD1	2.19339	0.00772726		ENST00000405154	RASSF8	2.36523	0.00796181
ENST00000346416	CDK5RAP1	2.17788	0.000416057		ENST00000291281	PRKD2	2.361	0.0254971
ENST00000395023	TCF7	2.16164	0.033882		ENST00000353920	GTF2I	2.36065	3.9e-07
ENST00000369788	CALHM2	2.16007	0.000350616		ENST00000298048	MELK	2.3473	0.00986019
ENST00000349752	GALNT14	2.15378	0.0108954		ENST00000249016	MCHR1	2.33611	0.00185649
ENST00000476238	RNASET2	2.14931	0.0100408		ENST00000482016	CGGBP1	2.31825	0.00880679
ENST00000371793	OLFM1	2.14338	4.77e-05		ENST00000349155	TBX3	2.30544	1.23e-08
ENST00000263556	P4HA1	2.14264	0.0543277		ENST00000397701	YBEY	2.29662	0.0384398
ENST00000391770	MYADM	2.14196	7.58e-05		ENST00000543795	MVB12A	2.2802	0.0035521
ENST00000393438	RUFY1	2.1325	0.00618236		ENST00000371494	SLC1A7	2.27417	0.000693606
ENST00000380324	USP3	2.12657	0.0274764		ENST00000356098	ARSA	2.25568	0.0270471
ENST00000368868	SELENBP1	2.12141	0.0229523		ENST00000403427	CRELD2	2.25473	0.0277674
ENST00000545174	NEK6	2.11444	0.0395483		ENST00000417584	GLUL	2.25022	0.029185
ENST00000355667	DNM2	2.10367	0.0085817		ENST00000436847	GSN	2.23391	3.04e-11
ENST00000251363	CERS4	2.10229	0.0387277		ENST00000242057	AHR	2.23176	9.63e-07
ENST00000322099	PCBP4	2.08299	0.0503094		ENST00000262861	SIPA1L2	2.22156	0.0036833
ENST00000417584	GLUL	2.05241	0.0530646		ENST00000381393	MBD3L2	2.21773	0.00937503
ENST00000350763	TNC	2.03105	0.050001		ENST00000281961	TMEM178A	2.21035	3.4e-06
ENST00000329908	IST1	2.02805	2.06e-05		ENST00000370986	GADD45A	2.15654	3.04e-17
ENST00000395744	PPP6R2	2.02294	0.0370414		ENST00000529632	SEZ6L	2.14496	0.000975788
ENST00000372648	TBC1D13	2.00849	0.0311442		ENST00000359013	TGFBR2	2.13068	0.0159806
ENST00000262817	TMEM59L	2.0067	0.0403174		ENST00000395744	PPP6R2	2.12982	0.0268425
ENST00000262861	SIPA1L2	2.00495	0.0112536		ENST00000315792	C8orf4	2.12159	3.23e-13
ENST00000267978	MAN2C1	2.00452	0.0159512		ENST00000399767	BID	2.11471	0.00885007
ENST00000529632	SEZ6L	2.00426	0.00256035		ENST00000591470	GCDH	2.06787	0.00320551
ENST00000395797	ZNF32	1.99909	0.0164316		ENST00000538780	FAM222A	2.0676	0.00474118
ENST00000318059	PAM16	1.99242	0.00093053		ENST00000579695	ORMDL3	2.04055	0.00283369
ENST00000598293	CPT1C	1.96749	0.0287318		ENST00000366930	TGFB2	2.02948	0.000836322
ENST00000301935	UBXN1	1.96372	2.91e-06		ENST00000604948	KIAA0391	2.01191	0.0326739
ENST00000375238	NECAB3	1.9402	0.0486765		ENST00000262432	METTL2B	2.00643	0.0217114
ENST00000567134	SNUPN	1.90798	0.0422445		ENST00000552361	RPS26	2.00628	0.00381442
ENST00000405154	RASSF8	1.90219	0.0469715		ENST00000400308	PCBP3	1.99624	3.99e-05
ENST00000312541	BTN2A1	1.89289	0.00221964		ENST00000349752	GALNT14	1.99227	0.022125
ENST00000358600	CD97	1.87881	0.0182122		ENST00000397267	SLC22A17	1.9873	0.0483467
ENST00000326932	DKK3	1.87664	0.0131075		ENST00000503771	TMEM158	1.97927	2.86e-09
ENST00000396761	ATG9A	1.85342	0.0158771		ENST00000430330	SCP2	1.95855	2.29e-06
ENST00000242057	AHR	1.8525	0.000134981		ENST00000376378	PRTFDC1	1.94884	0.0427318
ENST00000279035	PIGT	1.84574	0.00690858		ENST00000519110	FAM49B	1.94466	0.00690431
ENST00000338483	MAFF	1.81589	0.00813022		ENST00000397354	BCOR	1.92172	0.000269535
ENST00000315792	C8orf4	1.81194	3.72e-10		ENST00000559450	CERS4	1.91812	0.0258165
ENST00000249016	MCHR1	1.79043	0.0289098		ENST00000392190	NIT1	1.89913	0.0515952
ENST00000489960	TPRA1	1.78811	0.0195982		ENST00000360212	CD46	1.89878	0.00430343
ENST00000223357	AEBP1	1.77746	0.0375002		ENST00000280481	FREM2	1.89349	0.000240931
ENST00000392335	ARMC6	1.77518	0.0140375		ENST00000371793	OLFM1	1.89216	0.00058244
ENST00000436847	GSN	1.77128	7.25e-07		ENST00000428468	OSBPL9	1.88879	0.0041133
ENST00000400422	EIF4G3	1.76565	0.0236846		ENST00000381333	ASMTL	1.88155	0.000305812
ENST00000420607	ACADM	1.76326	0.0353065		ENST00000397443	CPNE1	1.8785	0.0118385
ENST00000222388	ABCF2	1.76257	0.0288735		ENST00000314754	CD55	1.84341	0.00165572
ENST00000381393	MBD3L2	1.75661	0.0475831		ENST00000430215	GGCX	1.84253	0.00475368
ENST00000396713	ZDHHC4	1.75416	0.0501534		ENST00000301935	UBXN1	1.8406	1.57e-05
ENST00000491381	SNX21	1.75356	0.0201466		ENST00000367815	ATP1B1	1.83837	0.00891425
ENST00000301050	CACNB3	1.7418	0.00152401		ENST00000395863	BMP7	1.83134	0.0512651
ENST00000575801	NXN	1.74179	0.0171619		ENST00000371474	NSMF	1.82445	0.00226197
ENST00000398812	GRB10	1.73644	0.00164493		ENST00000369483	IGSF3	1.81766	0.000758692
ENST00000257566	TBX3	1.73293	0.00250876		ENST00000451137	CYR61	1.80688	8.49e-08
ENST00000295008	MRPL55	1.73195	0.0281636		ENST00000199764	CEACAM6	1.80231	2.93e-08
ENST00000552361	RPS26	1.72313	0.0175056		ENST00000346416	CDK5RAP1	1.79638	0.00649369
ENST00000507656	ANAPC10	1.72171	0.0316116		ENST00000407537	COMT	1.77312	9.03e-05
ENST00000359683	NIF3L1	1.71788	0.0248817		ENST00000532434	NELL1	1.76724	0.0217019
ENST00000356511	PPIE	1.71007	0.04744		ENST00000335350	UNC5B	1.76405	0.00466041
ENST00000349155	TBX3	1.70556	0.000141824		ENST00000263341	IL1B	1.76231	0.0443604
ENST00000335350	UNC5B	1.69339	0.00712251		ENST00000394765	UBXN6	1.75427	0.00115397
ENST00000294435	RBP7	1.68442	0.0334548		ENST00000332509	PLA2G6	1.75334	0.0260589
ENST00000586752	METTL23	1.68182	0.0464249		ENST00000380546	SERPINB6	1.73993	0.00256653
ENST00000303592	KCNJ4	1.66571	0.0143866		ENST00000358867	TMEM126B	1.73969	0.00495072
ENST00000310571	PAAF1	1.66501	0.00266295		ENST00000333628	TUBB2A	1.73162	1.07e-20
ENST00000409735	PLD3	1.65798	8.31e-05		ENST00000489960	TPRA1	1.73104	0.0255885
ENST00000358906	FAM222A	1.65513	0.0546902		ENST00000372970	OSER1	1.72424	0.049532
ENST00000379786	PRR13	1.63952	0.0264489		ENST00000512913	SUB1	1.71732	4.3e-09
ENST00000264833	OLFM2	1.63685	0.0180876		ENST00000434726	SLC1A5	1.71644	0.0010381
ENST00000394553	PDE8A	1.63136	0.0396109		ENST00000342316	CSRNP3	1.70457	0.00973717
ENST00000302754	JUNB	1.62997	0.000740786		ENST00000396224	MAGED2	1.68468	0.0191842
ENST00000449103	PLXNB2	1.62001	0.000434175		ENST00000435064	CPSF3L	1.67861	0.0120116
ENST00000314754	CD55	1.61048	0.00808141		ENST00000409735	PLD3	1.67338	7.14e-05
ENST00000430012	DYRK1B	1.60562	0.0175578		ENST00000296978	TMEM200A	1.67107	0.0266634
ENST00000389093	PKM	1.59498	9.81e-05		ENST00000307677	BCL2L1	1.65944	0.0394543
ENST00000335686	SERPINB6	1.59478	0.00980518		ENST00000372469	PRRX2	1.65364	0.0217136
ENST00000369155	HIST2H2BE	1.58206	0.0493708		ENST00000369155	HIST2H2BE	1.65007	0.038706
ENST00000304593	MFF	1.57326	0.00626087		ENST00000517566	OXR1	1.63133	0.0422916
ENST00000372651	NFYC	1.57275	0.00420918		ENST00000261234	TMEM5	1.61758	0.0154048
ENST00000346301	TTC8	1.57226	0.0325203		ENST00000476627	TMUB1	1.61613	2.58e-05
ENST00000451137	CYR61	1.56578	6.74e-06		ENST00000224784	ACTA2	1.60497	1.5e-05
ENST00000370986	GADD45A	1.56359	8.77e-09		ENST00000288840	SMAD6	1.58961	0.0110171
ENST00000373192	UNC5B	1.56333	3.93e-06		ENST00000539719	ZNF362	1.58874	0.0529885
ENST00000361193	SLC26A11	1.55863	0.0389081		ENST00000264833	OLFM2	1.57973	0.0242213
ENST00000380546	SERPINB6	1.54935	0.00837425		ENST00000402799	MADD	1.57563	0.0434056
ENST00000371474	NSMF	1.54853	0.013148		ENST00000450904	MRPL21	1.5729	0.00644244
ENST00000545075	MTRNR2L10	1.54167	6.08e-09		ENST00000394128	MED24	1.56841	0.0105904
ENST00000289316	HIST1H2BD	1.5398	8.34e-06		ENST00000377208	POU4F1	1.56417	5.74e-16
ENST00000360535	CLIP3	1.53748	1.39e-07		ENST00000389093	PKM	1.56141	0.000156254
ENST00000394081	RARA	1.53001	0.0286728		ENST00000394553	PDE8A	1.5608	0.0522656
ENST00000336865	UNG	1.52559	0.0130704		ENST00000317551	CERS5	1.55655	0.00118094
ENST00000333868	CASP9	1.51668	0.0435473		ENST00000360535	CLIP3	1.55166	1.07e-07
ENST00000402003	YPEL5	1.51289	0.00913235		ENST00000307078	AXIN2	1.54846	0.00409633
ENST00000537971	TSPAN9	1.51243	2.33e-06		ENST00000373192	UNC5B	1.54753	5.53e-06
ENST00000356404	PITPNM1	1.51156	0.0318691		ENST00000303592	KCNJ4	1.5405	0.0270639
ENST00000330871	SOCS3	1.51103	0.0283817		ENST00000378075	LRRC10B	1.529	1.75e-12
ENST00000303469	METTL18	1.50224	0.0494752		ENST00000380787	MID1	1.52458	0.0163912
ENST00000535923	PHB2	1.49779	0.0194768		ENST00000329399	PDLIM1	1.5204	0.025175
ENST00000423777	ATF5	1.49364	1.53e-05		ENST00000398812	GRB10	1.51543	0.00832986
ENST00000330165	RBM8A	1.4765	0.0121069		ENST00000520876		1.50926	0.00364561
ENST00000430215	GGCX	1.47052	0.0338061		ENST00000366985	ATF3	1.50736	0.0298073
ENST00000520876		1.46667	0.00491727		ENST00000453702	SLC7A8	1.50262	0.00291924
ENST00000323039	DYRK1B	1.46225	0.00649246		ENST00000566799	CORO2B	1.489	0.000228424
ENST00000400308	PCBP3	1.46199	0.0059289		ENST00000252936	TUBGCP2	1.4774	0.00358732
ENST00000417981	ECSIT	1.4598	0.00726002		ENST00000455319	FBXL6	1.47415	0.0469976
ENST00000333055	MGAT1	1.45691	0.00668135		ENST00000244745	SOX4	1.46636	8.1e-07
ENST00000374088	AKNA	1.43839	0.0190316		ENST00000320895	CLPTM1L	1.46152	0.0199424
ENST00000062104	NNAT	1.42768	0.00680193		ENST00000281938	HSPB8	1.45651	0.00566341
ENST00000351808	IFT88	1.41528	0.0427077		ENST00000300527	COL6A2	1.45533	0.0411527
ENST00000316358	ZNF133	1.41486	0.0361271		ENST00000449103	PLXNB2	1.45531	0.00218479
ENST00000367993	NDUFS2	1.41454	0.0120301		ENST00000530047	SLC52A2	1.45489	0.0280928
ENST00000366930	TGFB2	1.40855	0.0363524		ENST00000393370	PPP2R4	1.45426	0.046379
ENST00000512913	SUB1	1.40379	3.22e-06		ENST00000455784	2014-09-05	1.43974	0.019509
ENST00000216780	PCK2	1.4005	8.87e-06		ENST00000490511	CREM	1.43316	0.0418615
ENST00000403564	RPS7	1.3932	0.0492361		ENST00000264554	SHC2	1.4327	0.0214721
ENST00000543500	MTRNR2L3	1.39171	2.92e-07		ENST00000233813	IGFBP5	1.43	7.69e-10
ENST00000252506	GADD45G	1.3886	9.6e-06		ENST00000361802	ABCG1	1.42656	0.026274
ENST00000224784	ACTA2	1.38518	0.000249945		ENST00000330165	RBM8A	1.42226	0.0169341
ENST00000281961	TMEM178A	1.37113	0.010387		ENST00000403305	C22orf23	1.41774	0.0385969
ENST00000536609	PCSK2	1.36928	5.67e-18		ENST00000402003	YPEL5	1.41372	0.0156256
ENST00000378075	LRRC10B	1.36899	4.22e-10		ENST00000369049	ECM1	1.41228	1.19e-05
ENST00000381753	LIMCH1	1.36788	0.0500534		ENST00000312541	BTN2A1	1.41016	0.0361608
ENST00000544932	MTRNR2L9	1.36429	1.68e-07		ENST00000571688	LITAF	1.40899	0.00809099
ENST00000264554	SHC2	1.36251	0.0302242		ENST00000359644	ATP2C1	1.40859	0.0488727
ENST00000361189	PJA2	1.36231	0.00554525		ENST00000334690	TRAPPC11	1.4083	0.0268494
ENST00000394353	GSN	1.35802	0.0112514		ENST00000302754	JUNB	1.40753	0.003798
ENST00000225831	CCL2	1.35242	0.0170388		ENST00000536609	PCSK2	1.40461	6.6e-19
ENST00000173898	TRO	1.34649	0.0459425		ENST00000219070	MMP2	1.40178	3.94e-07
ENST00000394308	ASNS	1.34406	0.000317662		ENST00000355849	KHDRBS3	1.4005	0.0294948
ENST00000317551	CERS5	1.34404	0.00677649		ENST00000351808	IFT88	1.39924	0.046288
ENST00000199764	CEACAM6	1.33942	0.00013771		ENST00000430012	DYRK1B	1.39786	0.0464236
ENST00000281938	HSPB8	1.33492	0.0127594		ENST00000315491		1.39718	0.00840217
ENST00000299886	COG1	1.33045	0.0496621		ENST00000330843	RAB11FIP1	1.39547	0.00915276
ENST00000379775	PFKFB3	1.32503	6.51e-05		ENST00000586659	KANK2	1.38855	0.0160571
ENST00000243077	LRP1	1.32444	0.00791792		ENST00000339431	LRRC17	1.38832	0.000870505
ENST00000357402	MVP	1.31914	0.00745654		ENST00000358314	PPHLN1	1.38525	0.041945
ENST00000261207	PPP1R12A	1.31574	0.0376406		ENST00000394081	RARA	1.38381	0.054103
ENST00000381333	ASMTL	1.31136	0.0220983		ENST00000454214	NDUFB3	1.35688	0.00970904
ENST00000343575	CXCL12	1.30978	8.53e-05		ENST00000373004	SRPX2	1.35521	5.66e-09
ENST00000336708	TRIM16	1.3061	0.0279388		ENST00000400286	SLITRK6	1.35213	2.06e-09
ENST00000368316	ARHGEF2	1.30581	0.00505694		ENST00000283148	UXS1	1.34253	0.0230405
ENST00000369637	RHOC	1.30496	0.050212		ENST00000448464	TP53INP1	1.33862	0.0522864
ENST00000233813	IGFBP5	1.30391	3.17e-08		ENST00000330181	SLX1B	1.33836	0.0192462
ENST00000299529	CRABP1	1.30335	0.00146797		ENST00000393118	CALD1	1.33647	0.0256743
ENST00000355849	KHDRBS3	1.29677	0.0470081		ENST00000332235	C2CD4C	1.33407	0.0525672
ENST00000262055	LETMD1	1.29544	0.00616198		ENST00000252506	GADD45G	1.33029	2.33e-05
ENST00000368445	SHC1	1.29487	0.0221993		ENST00000368445	SHC1	1.32456	0.0193397
ENST00000378239	ERLEC1	1.29208	0.0322617		ENST00000249923	COPB1	1.32342	0.0189745
ENST00000330181	SLX1B	1.28355	0.0257294		ENST00000336865	UNG	1.31716	0.0339586
ENST00000407537	COMT	1.27876	0.00931652		ENST00000259818	TUBB2B	1.31212	9.04e-08
ENST00000258168	BCMO1	1.27231	0.0386049		ENST00000442544	DCC	1.30541	0.0112012
ENST00000292539	PPP1R16A	1.2705	0.00179215		ENST00000216780	PCK2	1.30111	4.31e-05
ENST00000574425	NMRAL1	1.26917	0.0313305		ENST00000391770	MYADM	1.29142	0.0395572
ENST00000503771	TMEM158	1.26149	0.000531535		ENST00000264933	PDCD6	1.28541	0.000181358
ENST00000379979	GLRX	1.25493	0.0180867		ENST00000357639	ENPP3	1.28339	0.000865562
ENST00000539015	FHL1	1.25361	0.00407553		ENST00000370445	BARHL2	1.27676	0.00179295
ENST00000370445	BARHL2	1.25291	0.00220774		ENST00000074304	INPP4A	1.2759	0.0456104
ENST00000371694	AGPAT2	1.25166	0.0284497		ENST00000355666	TTC3	1.27566	0.000618502
ENST00000397354	BCOR	1.24811	0.0331846		ENST00000545075	MTRNR2L10	1.27395	1.54e-06
ENST00000458349	RPL28	1.2453	2.26e-07		ENST00000355852	PCBP4	1.27322	0.000727384
ENST00000536684	MTRNR2L8	1.23812	1.12e-06		ENST00000377707	SHB	1.26884	6.4e-06
ENST00000375477	PCID2	1.23788	0.0292108		ENST00000366592	GPR137B	1.26204	0.00967556
ENST00000337581	SMUG1	1.22589	0.0269571		ENST00000335686	SERPINB6	1.25985	0.0544854
ENST00000429673	IFRD2	1.22113	0.0177325		ENST00000300584	TBC1D2B	1.25806	4.88e-05
ENST00000405342	NT5C3A	1.21656	0.0399261		ENST00000301050	CACNB3	1.25588	0.0358572
ENST00000393263	NAP1L1	1.21419	0.000336011		ENST00000543500	MTRNR2L3	1.25347	5.51e-06
ENST00000317449	LRRN4CL	1.21118	0.0457859		ENST00000602637	HIST1H2AC	1.24871	0.0139665
ENST00000540040	MTRNR2L1	1.21003	1.33e-06		ENST00000289316	HIST1H2BD	1.24842	0.000614422
ENST00000305544	LAMB2	1.20979	0.0171354		ENST00000323039	DYRK1B	1.23981	0.0267102
ENST00000348419	CNN2	1.20419	4.49e-08		ENST00000355377	SYT17	1.23481	0.00423242
ENST00000239938	EGR1	1.19897	0.0204376		ENST00000248564	GNG11	1.23392	1.42e-06
ENST00000373004	SRPX2	1.19567	4.7e-07		ENST00000370828	GPC4	1.22701	6.54e-06
ENST00000206451	PSME1	1.18991	3.01e-05		ENST00000335504	MAGED4B	1.22214	0.00965799
ENST00000534147	AKIP1	1.18407	0.0499447		ENST00000518721	ASAP1	1.21414	0.0448935
ENST00000399974	MTRNR2L4	1.18243	4.25e-06		ENST00000394308	ASNS	1.20775	0.00123145
ENST00000454214	NDUFB3	1.18013	0.0286397		ENST00000435510	NRBF2	1.20513	0.0506096
ENST00000400286	SLITRK6	1.17994	3.11e-07		ENST00000243077	LRP1	1.20451	0.0180494
ENST00000467815	SULF2	1.17683	0.0349528		ENST00000348419	CNN2	1.20387	4.81e-08
ENST00000372677	BEX2	1.17404	0.000737407		ENST00000555694	ACYP1	1.19939	0.00627116
ENST00000309190	CAST	1.16586	0.0354112		ENST00000322764	ZYX	1.19529	0.013579
ENST00000372805	CAP1	1.16486	0.00984127		ENST00000423777	ATF5	1.19372	0.000547367
ENST00000200453	PPP1R15A	1.16339	0.000199782		ENST00000265678	RPS6KA2	1.18472	3.16e-05
ENST00000237858	GLRX	1.16101	0.00046581		ENST00000329908	IST1	1.17586	0.0314488
ENST00000566799	CORO2B	1.14932	0.00714702		ENST00000295171	CCDC74A	1.17156	0.0437696
ENST00000539609	ZEB2	1.14665	0.0363135		ENST00000333055	MGAT1	1.16902	0.0387896
ENST00000216146	RPL3	1.12566	0.0012917		ENST00000407032	NUCB1	1.16672	0.0513406
ENST00000326427	ITM2C	1.1234	5.16e-05		ENST00000536684	MTRNR2L8	1.16639	4.36e-06
ENST00000409419	PLD3	1.11872	0.0114423		ENST00000266754	GAS2L3	1.16413	0.0502316
ENST00000372397	TSC22D3	1.11521	0.00304133		ENST00000429426	MLLT3	1.16362	0.0168058
ENST00000340857	H1F0	1.1116	7.63e-09		ENST00000298190	KRBOX4	1.1632	0.0505487
ENST00000361308	LMNA	1.11065	0.0521714		ENST00000358537	FLNB	1.15783	0.0133391
ENST00000584539	MYL12B	1.10611	0.0240553		ENST00000343575	CXCL12	1.15611	0.000758964
ENST00000309470	CSK	1.09862	0.0230763		ENST00000540040	MTRNR2L1	1.15198	4.12e-06
ENST00000264933	PDCD6	1.09491	0.00184855		ENST00000370544	LMO4	1.15087	0.039399
ENST00000265678	RPS6KA2	1.09337	0.00013628		ENST00000394202	CNN3	1.14742	0.00319851
ENST00000358537	FLNB	1.0891	0.0206854		ENST00000428708	BAIAP2	1.14438	0.0239645
ENST00000435907	CHST15	1.08412	0.00262866		ENST00000315453	OR2A4	1.13519	0.0413798
ENST00000333628	TUBB2A	1.0817	2.23e-08		ENST00000367922	DDR2	1.13091	2.16e-06
ENST00000216124	ARSA	1.08053	0.0192325		ENST00000200453	PPP1R15A	1.12935	0.000341905
ENST00000357384	RPRD1A	1.07925	0.0513325		ENST00000292539	PPP1R16A	1.12926	0.00665463
ENST00000402217	C22orf15	1.07665	0.0421276		ENST00000437644	RABL5	1.12885	0.0471045
ENST00000317168	ASCC1	1.07404	0.0348719		ENST00000537606	SNX17	1.1242	0.0367663
ENST00000377707	SHB	1.06885	0.000218951		ENST00000297737	ZMAT4	1.12264	2.76e-07
ENST00000400485	MORC3	1.06279	0.0274622		ENST00000286201	FZD7	1.11893	0.0322382
ENST00000417763	CLUAP1	1.05703	0.0175995		ENST00000361248	MXI1	1.11783	0.00713329
ENST00000394202	CNN3	1.05693	0.00722293		ENST00000340342	CTSL	1.11695	6.69e-08
ENST00000232744	ABTB1	1.05689	0.0295759		ENST00000302342	ZNF217	1.11314	0.0107738
ENST00000378825	CCDC3	1.05603	0.000321141		ENST00000341272	GSN	1.11292	5.27e-12
ENST00000337656	CREM	1.05462	0.0543145		ENST00000544932	MTRNR2L9	1.11188	1.9e-05
ENST00000369049	ECM1	1.05396	0.00207261		ENST00000396435	IQSEC2	1.11152	0.0136798
ENST00000264712	KIF3C	1.0506	0.0489561		ENST00000399974	MTRNR2L4	1.1075	1.94e-05
ENST00000409168	SHISA6	1.05035	0.0292211		ENST00000370690	FHL1	1.10646	0.00232603
ENST00000259339	TOR1B	1.04562	2.65e-05		ENST00000315087	ST8SIA5	1.10476	0.0306711
ENST00000421093	ZNF219	1.04221	0.0391555		ENST00000379589	LHFP	1.10406	2.34e-08
ENST00000379270	SAT1	1.04218	0.000108541		ENST00000239938	EGR1	1.10012	0.0339397
ENST00000259818	TUBB2B	1.03978	4.21e-05		ENST00000498273	L1TD1	1.09361	5.49e-06
ENST00000566866	EIF3C	1.03698	0.00200523		ENST00000372684	RIMS3	1.0884	3.3e-06
ENST00000355852	PCBP4	1.03218	0.00841555		ENST00000395833	LMO2	1.08725	0.000533574
ENST00000449640	PCBP3	1.02913	0.0519304		ENST00000317459	TRPT1	1.08369	0.00313809
ENST00000356613	ARC	1.02356	0.0345986		ENST00000401525	WIPI2	1.07814	0.0197253
ENST00000338663	SLC3A2	1.02278	0.000413318		ENST00000380062	IFT74	1.0773	0.0212518
ENST00000300584	TBC1D2B	1.02173	0.00140133		ENST00000371964	SURF2	1.06961	0.02074
ENST00000352327	THYN1	1.021	0.0382901		ENST00000259339	TOR1B	1.06859	1.73e-05
ENST00000248564	GNG11	1.0179	0.000102014		ENST00000588852	SAFB	1.06164	0.012076
ENST00000538396	FAM195B	1.01729	0.000762048		ENST00000378827	BMP2	1.06131	0.000476603
ENST00000429789	CHID1	1.01629	0.0458251		ENST00000237858	GLRX	1.06013	0.00159878
ENST00000296411	METAP1	1.01608	0.0410449		ENST00000379775	PFKFB3	1.05975	0.00180263
ENST00000341590	FERMT2	0.999114	0.0509468		ENST00000449699	NDUFS1	1.05917	0.0413532
ENST00000498273	L1TD1	0.982994	4.38e-05		ENST00000343827	TCF12	1.05836	5.4e-08
ENST00000298295	C10orf10	0.982911	0.000165035		ENST00000341590	FERMT2	1.05467	0.038068
ENST00000357639	ENPP3	0.982352	0.0152141		ENST00000379270	SAT1	1.05175	9.45e-05
ENST00000397709	MAP1LC3A	0.98046	0.00885186		ENST00000370236	MRPL43	1.05016	0.00866218
ENST00000597279	EMP3	0.977185	0.00141149		ENST00000372397	TSC22D3	1.0498	0.00552845
ENST00000340342	CTSL	0.969692	4.07e-06		ENST00000435907	CHST15	1.04952	0.0038967
ENST00000292433	IER2	0.967318	0.000980624		ENST00000340857	H1F0	1.04772	6.86e-08
ENST00000261858	GLCE	0.965505	0.00739926		ENST00000206451	PSME1	1.0442	0.000351383
ENST00000266458	GABARAPL1	0.963861	1.55e-08		ENST00000396618	COCH	1.04344	0.0415753
ENST00000341272	GSN	0.96263	3.77e-09		ENST00000482108	PEG10	1.04325	0.000659318
ENST00000241704	COPA	0.961369	0.0464301		ENST00000375036	MXRA7	1.04178	8.58e-05
ENST00000371222	JUN	0.956731	0.0201422		ENST00000370542	LMO4	1.03633	0.00017542
ENST00000244745	SOX4	0.953677	0.00321866		ENST00000221980	ICAM5	1.031	0.00827409
ENST00000413268	LTA4H	0.952991	0.0454195		ENST00000361866	COL6A1	1.02756	0.0159691
ENST00000447609	LMO3	0.94872	2.31e-05		ENST00000429789	CHID1	1.02567	0.0441307
ENST00000372684	RIMS3	0.943964	6.46e-05		ENST00000303660	ZEB2	1.0216	0.0138095
ENST00000361248	MXI1	0.943072	0.0271805		ENST00000262545	PCSK2	1.01929	0.000356309
ENST00000371571	KCNG1	0.942287	8.65e-05		ENST00000262395	TRAF4	1.01879	0.0430242
ENST00000446533	CHAC1	0.942216	0.0510057		ENST00000305544	LAMB2	1.01821	0.0528515
ENST00000258494	ALDH1L2	0.941509	0.0492673		ENST00000356613	ARC	1.0178	0.0363508
ENST00000395068	GRINA	0.939735	0.00175352		ENST00000309495	ZNF654	1.01684	0.0195526
ENST00000593892	SEPW1	0.939684	0.00142734		ENST00000555404	TIMM9	1.01427	0.00849282
ENST00000411744	EXOC7	0.937239	0.0232071		ENST00000378825	CCDC3	1.00892	0.000664662
ENST00000347053	COG5	0.933115	0.0338195		ENST00000357814	NAT9	1.00756	0.0345367
ENST00000248071	KLF2	0.932552	0.0234121		ENST00000545652	GSN	1.00737	0.0305465
ENST00000370542	LMO4	0.92962	0.000869048		ENST00000242261	TWIST1	1.00311	0.0161365
ENST00000401419	MPST	0.92841	0.00584548		ENST00000599732	PTOV1	1.00022	0.00116201
ENST00000343827	TCF12	0.9196	2.95e-06		ENST00000287263	RAB11FIP1	0.998575	0.000524046
ENST00000446046	FN1	0.915604	0.000700415		ENST00000538396	FAM195B	0.990225	0.00111658
ENST00000238609	IFI27L2	0.91382	0.00261565		ENST00000272233	RHOB	0.988925	0.00159505
ENST00000604882	MTRNR2L2	0.912947	9.79e-05		ENST00000347053	COG5	0.982741	0.0245954
ENST00000555523	IFI27L1	0.91169	0.0398536		ENST00000609331	APBB1	0.978655	0.0487416
ENST00000542575	SLC1A5	0.909292	0.000182572		ENST00000375053	MAGED2	0.977626	0.00450503
ENST00000339123	SMOX	0.907309	0.0218831		ENST00000438792	KTN1	0.974432	0.0258259
ENST00000398838	YPEL3	0.904509	0.00340381		ENST00000224237	VIM	0.973951	9.92e-11
ENST00000262545	PCSK2	0.903417	0.00180833		ENST00000295598	ATP1A1	0.971068	7.4e-05
ENST00000303562	FOS	0.903398	0.0329747		ENST00000355841	PDLIM7	0.970526	0.000870202
ENST00000300086	TERF2IP	0.90304	1.81e-06		ENST00000248071	KLF2	0.969858	0.0179994
ENST00000297737	ZMAT4	0.900911	5.88e-05		ENST00000424479	PPAPDC1B	0.960218	0.0491505
ENST00000378827	BMP2	0.900654	0.00383355		ENST00000361901	CALD1	0.960011	0.00110771
ENST00000397852	ITGB2	0.891737	0.0381411		ENST00000409168	SHISA6	0.956297	0.0514322
ENST00000347970	TM2D3	0.89139	0.0147024		ENST00000604882	MTRNR2L2	0.956018	4.57e-05
ENST00000375058	MAGED2	0.890755	1.52e-05		ENST00000264057	DGKD	0.951108	0.000225725
ENST00000337478	ITPRIP	0.890286	0.0250184		ENST00000300302	HERPUD1	0.949871	6.9e-05
ENST00000221980	ICAM5	0.887698	0.0254685		ENST00000357991	GPR64	0.949326	7.51e-07
ENST00000400299		0.886601	0.0041837		ENST00000379018	PDLIM4	0.938589	0.0301654
ENST00000269397	CBX4	0.882504	0.0267012		ENST00000381174	XG	0.935455	7.79e-09
ENST00000006777	RHBDD2	0.880302	0.00275729		ENST00000504595	FBXL7	0.935265	0.0399719
ENST00000286049	XAGE2B	0.879553	0.0012236		ENST00000347970	TM2D3	0.933655	0.0103569
ENST00000369883	C10orf32	0.877867	0.0235049		ENST00000453848	TMEM132A	0.933354	0.0482221
ENST00000262027	MARS	0.877476	0.000612614		ENST00000478730	ORAI2	0.931563	0.0330908
ENST00000361866	COL6A1	0.877108	0.0444259		ENST00000374429	CXCL12	0.9314	0.0144953
ENST00000373477	YARS	0.875616	0.000847286		ENST00000455895	BSDC1	0.916544	0.002279
ENST00000309495	ZNF654	0.87534	0.0491494		ENST00000371571	KCNG1	0.915545	0.000149987
ENST00000372685	TCEAL8	0.870977	0.00134885		ENST00000542575	SLC1A5	0.913642	0.000173655
ENST00000376105	ID1	0.870797	0.00155739		ENST00000263688	SUCO	0.909826	0.0128299
ENST00000372310	SLC6A9	0.869459	0.00272892		ENST00000371222	JUN	0.905875	0.0283336
ENST00000377208	POU4F1	0.867594	1.31e-05		ENST00000512469	GLRX	0.905614	0.005861
ENST00000329245	TOP1MT	0.861905	0.00363404		ENST00000323267	TMEM63B	0.900076	0.0244924
ENST00000272233	RHOB	0.860323	0.00677791		ENST00000258173	TMEM231	0.898851	0.0427339
ENST00000445593	LAPTM4B	0.85833	0.000112914		ENST00000372185	FAM213A	0.897543	0.00374327
ENST00000276692	TATDN1	0.857657	0.000531419		ENST00000353258	GDE1	0.895592	7.16e-05
ENST00000317968	PDLIM5	0.85501	0.0093768		ENST00000281821	EPHA4	0.892803	0.00351429
ENST00000497164	MAGED4B	0.852842	0.00353489		ENST00000300086	TERF2IP	0.892702	2.54e-06
ENST00000315970	OS9	0.851896	0.00140554		ENST00000238609	IFI27L2	0.892241	0.00333927
ENST00000370828	GPC4	0.849985	0.00303719		ENST00000445593	LAPTM4B	0.89136	6.02e-05
ENST00000219070	MMP2	0.846078	0.00463159		ENST00000342245	SMPD1	0.891287	0.000113513
ENST00000397410	AKAP8L	0.845164	0.0257227		ENST00000316891	TRIT1	0.886765	0.0230049
ENST00000231948	CRBN	0.842588	0.0390433		ENST00000393808	ST3GAL5	0.886416	0.032772
ENST00000374429	CXCL12	0.842082	0.0290467		ENST00000447609	LMO3	0.883686	9.4e-05
ENST00000379589	LHFP	0.841456	3.72e-05		ENST00000293760	LEMD2	0.883049	0.0544754
ENST00000376112	ID1	0.838046	8.67e-09		ENST00000415680	TRIM24	0.882624	0.00539833
ENST00000542783	TIPARP	0.835179	0.00130474		ENST00000258530	APPL2	0.882202	0.0510244
ENST00000258412	TMBIM1	0.834681	0.00754101		ENST00000271588	HMCN1	0.877258	0.00594191
ENST00000330938	PTTG1IP	0.828897	0.00729867		ENST00000308385	DUSP6	0.876683	0.00914668
ENST00000391971	2014-09-02	0.823786	0.00195005		ENST00000284818	LY96	0.872959	0.0134577
ENST00000355209	POLR3H	0.82376	0.0439316		ENST00000358157	S1PR3	0.872147	0.0521411
ENST00000241393	CXCR4	0.818584	0.000356121		ENST00000220597	PAG1	0.871515	0.0193588
ENST00000025008	RB1CC1	0.816475	0.0356377		ENST00000397709	MAP1LC3A	0.868095	0.023422
ENST00000367922	DDR2	0.813637	0.00108105		ENST00000330387	CREB3L2	0.866876	0.0479331
ENST00000407327	SLC44A2	0.813305	0.0265967		ENST00000423823	ZNF302	0.86279	0.0433954
ENST00000452441	DDR1	0.811395	0.0496226		ENST00000239223	DUSP1	0.858385	0.0119797
ENST00000284818	LY96	0.808282	0.0227519		ENST00000507680	GNGT2	0.857417	0.0374843
ENST00000412532	SLC1A5	0.807944	0.00640026		ENST00000311669	ADPGK	0.854971	0.0453255
ENST00000358655	WARS	0.799832	0.00180712		ENST00000371384	FAM210B	0.854441	0.0362098
ENST00000355666	TTC3	0.796925	0.0461623		ENST00000266458	GABARAPL1	0.852673	7.95e-07
ENST00000379698	SH3KBP1	0.795218	0.00785081		ENST00000323482	ACSS1	0.845524	6.23e-05
ENST00000217233	TRIB3	0.794813	0.0299835		ENST00000238788	TMEM214	0.845519	0.0514649
ENST00000222399	LAMB1	0.793068	0.00966806		ENST00000448775	CLMP	0.843164	0.00292907
ENST00000224237	VIM	0.792634	1.43e-07		ENST00000342228	SLC20A2	0.842803	0.00051078
ENST00000358932	CCNB1IP1	0.791547	0.00190309		ENST00000392020	ATG16L1	0.84172	0.0282382
ENST00000372422	YIPF3	0.785306	0.00577426		ENST00000382361	FSCN1	0.833809	7.22e-06
ENST00000339872	HMGB1	0.781261	0.00548825		ENST00000502280	CCNG2	0.833734	0.00515533
ENST00000281821	EPHA4	0.77874	0.012033		ENST00000597279	EMP3	0.824382	0.00826868
ENST00000356956	IGF2R	0.774491	0.0053489		ENST00000315970	OS9	0.819968	0.00227856
ENST00000370690	FHL1	0.771521	0.0413915		ENST00000330938	PTTG1IP	0.81914	0.00831097
ENST00000282058	HAUS1	0.770211	0.0354336		ENST00000379698	SH3KBP1	0.816675	0.00629087
ENST00000239223	DUSP1	0.766942	0.0263847		ENST00000337478	ITPRIP	0.814743	0.0432299
ENST00000400167	TGIF1	0.765062	0.0425315		ENST00000549555	DAZAP2	0.814389	0.0256871
ENST00000326587	MAGED1	0.76234	4.2e-06		ENST00000355621	UBE2H	0.814154	0.0047675
ENST00000222219	DNASE2	0.760594	0.000732377		ENST00000552783	LIMA1	0.813587	0.0305282
ENST00000368902	SCNM1	0.760464	0.015135		ENST00000308873	RUNX3	0.810166	0.0261931
ENST00000310325	CTSF	0.757066	0.0192898		ENST00000229708	ULBP1	0.810106	0.0241286
ENST00000372185	FAM213A	0.755609	0.016929		ENST00000431664	SAR1A	0.809912	0.00773897
ENST00000353258	GDE1	0.755456	0.00099126		ENST00000025008	RB1CC1	0.809744	0.0379746
ENST00000369409	PHGDH	0.753664	1.5e-06		ENST00000310346	TBX5	0.806523	0.00463679
ENST00000375053	MAGED2	0.752957	0.0307327		ENST00000339872	HMGB1	0.805875	0.00413337
ENST00000370206	CNN3	0.750157	0.000584769		ENST00000338663	SLC3A2	0.801888	0.00579035
ENST00000544232	TMEM91	0.747899	0.0341562		ENST00000303375	MRC2	0.798596	0.0371018
ENST00000234677	SARS	0.745136	0.000506144		ENST00000429747	CPNE4	0.795909	0.0397065
ENST00000361901	CALD1	0.744025	0.0141924		ENST00000316355	CCNG2	0.793179	0.0549795
ENST00000602683	PTP4A2	0.743891	0.0309833		ENST00000241393	CXCR4	0.791467	0.000574358
ENST00000369103	RGS10	0.743281	0.000382511		ENST00000313843	STX4	0.789968	0.046536
ENST00000300605	HDHD2	0.742493	0.0363646		ENST00000240285	RDH10	0.788064	0.0144056
ENST00000355653	VAT1	0.739706	0.00103444		ENST00000361464	MGEA5	0.787567	0.00562446
ENST00000549555	DAZAP2	0.739549	0.0445461		ENST00000358655	WARS	0.783711	0.00234064
ENST00000382361	FSCN1	0.738195	8.37e-05		ENST00000376105	ID1	0.780826	0.00520438
ENST00000335972	UBA1	0.737272	0.00427542		ENST00000397410	AKAP8L	0.774776	0.0437277
ENST00000266383	B4GALNT3	0.734527	0.012133		ENST00000378863	CRLS1	0.774187	0.0283669
ENST00000529927	NDUFV1	0.734355	0.0111425		ENST00000452248	STOML2	0.774127	0.0108375
ENST00000372691	BEX4	0.734265	0.00922094		ENST00000292433	IER2	0.772855	0.00873146
ENST00000397615	RNH1	0.728873	0.0542718		ENST00000326587	MAGED1	0.772354	3.16e-06
ENST00000564751	CD276	0.728639	0.0510528		ENST00000356956	IGF2R	0.771682	0.00566271
ENST00000366601	TBCE	0.726119	0.0522755		ENST00000262065	MMD	0.768757	0.0251497
ENST00000278224	CARS	0.724102	0.00453729		ENST00000587091	SLC16A2	0.761318	0.0126566
ENST00000308385	DUSP6	0.72162	0.034217		ENST00000231061	SPARC	0.758778	0.000205155
ENST00000329875	PYCR1	0.719768	0.00038119		ENST00000370253	FNBP1L	0.753705	0.0161827
ENST00000301264	DAPK3	0.715093	0.0404292		ENST00000394657	AKTIP	0.752239	0.0128845
ENST00000302538	ABR	0.711571	0.0408263		ENST00000290573	HK2	0.750158	0.0278159
ENST00000346798	APP	0.707561	0.000447808		ENST00000399798	ATP6V1E1	0.74984	0.00154158
ENST00000379453	ADRA1D	0.7065	1.07e-05		ENST00000370775	FAM127B	0.749385	0.0439288
ENST00000355841	PDLIM7	0.704055	0.0195311		ENST00000261858	GLCE	0.748463	0.0461716
ENST00000599732	PTOV1	0.698891	0.0303956		ENST00000335765	UNC119	0.745945	0.014267
ENST00000558530	TGIF2-C20orf24	0.698517	0.0285391		ENST00000286049	XAGE2B	0.744471	0.00744839
ENST00000358171	SERPINH1	0.695942	0.00075974		ENST00000369159	HIST2H2AA4	0.742829	0.0531216
ENST00000252485	PVRL2	0.695792	0.0382909		ENST00000216146	RPL3	0.740143	0.0354022
ENST00000569031	PINLYP	0.694164	0.0468219		ENST00000400299		0.73818	0.0201189
ENST00000472484	TCEAL4	0.689097	0.0478178		ENST00000372691	BEX4	0.737846	0.00901913
ENST00000261733	ALDH2	0.684658	0.00166023		ENST00000358487	FGFR2	0.732861	0.00395372
ENST00000342245	SMPD1	0.683952	0.00338197		ENST00000401419	MPST	0.731881	0.0351857
ENST00000413364	LITAF	0.681615	0.000155139		ENST00000542783	TIPARP	0.72901	0.00584212
ENST00000243347	TNFAIP6	0.677912	9.92e-08		ENST00000405440	TBX5	0.727343	0.0395319
ENST00000263273	NUCB1	0.676812	0.00797036		ENST00000375442	TSPYL2	0.727162	0.00457803
ENST00000349038	PTBP1	0.675781	0.0271546		ENST00000358932	CCNB1IP1	0.724701	0.0047568
ENST00000378474	MID1IP1	0.675026	0.00632843		ENST00000378344	TPRG1L	0.720325	0.0330898
ENST00000338825	EIF4EBP1	0.674162	0.00172415		ENST00000301264	DAPK3	0.719758	0.0395715
ENST00000358252	TNKS1BP1	0.673908	0.0448096		ENST00000340124	GPT2	0.719745	0.0181249
ENST00000367651	CITED2	0.673164	9.55e-08		ENST00000262027	MARS	0.718056	0.00548529
ENST00000413699	RPL15	0.671961	0.000292768		ENST00000358252	TNKS1BP1	0.71604	0.0322697
ENST00000299610	MFAP4	0.671395	0.0010557		ENST00000288670	FMNL2	0.714421	0.0142623
ENST00000375442	TSPYL2	0.670431	0.00934984		ENST00000395068	GRINA	0.713182	0.0228242
ENST00000389675	MRPL28	0.668756	0.0259987		ENST00000374490	HMGCL	0.713003	0.0273118
ENST00000222969	BUD31	0.666803	0.0189487		ENST00000400335	KREMEN1	0.708813	0.00403916
ENST00000290573	HK2	0.663187	0.0546686		ENST00000421699	GOLGA2	0.706648	0.0132788
ENST00000279396	TMEM219	0.662069	0.0411326		ENST00000336032	PNRC1	0.704707	0.010125
ENST00000252725	ARPC1B	0.661774	0.0519157		ENST00000285930	AKR1B1	0.703929	1.28e-05
ENST00000512469	GLRX	0.660825	0.0498236		ENST00000458349	RPL28	0.702807	0.0042177
ENST00000342266	AKAP7	0.660524	0.0108741		ENST00000355899	PLS3	0.700396	0.000383254
ENST00000397890	CRMP1	0.659939	0.00240383		ENST00000494801	TCEAL4	0.700011	0.00172286
ENST00000337057	EPB41L2	0.659886	0.000288077		ENST00000317968	PDLIM5	0.699292	0.0391987
ENST00000372116	MRPS18A	0.658435	0.0456836		ENST00000262428	COTL1	0.698832	0.0267122
ENST00000286371	ATP1B3	0.657683	0.00180242		ENST00000335972	UBA1	0.69645	0.00727212
ENST00000381317	ASMTL	0.656744	0.00306934		ENST00000378470	FAM107B	0.695948	0.000227429
ENST00000541517	TPCN1	0.65578	0.0190178		ENST00000375058	MAGED2	0.693576	0.00100449
ENST00000260408	ADAM10	0.65563	0.0283095		ENST00000261483	MAN2A1	0.690492	0.028539
ENST00000526054	VPS28	0.654859	0.000386851		ENST00000398158	CBS	0.688924	0.0131671
ENST00000295598	ATP1A1	0.653683	0.0077029		ENST00000278224	CARS	0.687023	0.00742233
ENST00000585933	CEBPG	0.652785	0.0251956		ENST00000541517	TPCN1	0.687012	0.0138898
ENST00000389266	GARS	0.652686	0.0283645		ENST00000310325	CTSF	0.684292	0.0373259
ENST00000231061	SPARC	0.651144	0.00160752		ENST00000379097	TPD52	0.683975	0.0259094
ENST00000352435	PRDX5	0.648918	0.00418288		ENST00000298295	C10orf10	0.683131	0.0118094
ENST00000376588	PSAT1	0.648738	0.0127382		ENST00000266383	B4GALNT3	0.679225	0.0219796
ENST00000323482	ACSS1	0.646454	0.00266909		ENST00000446046	FN1	0.679214	0.0121405
ENST00000521604	TCEA1	0.645691	0.00501215		ENST00000367466	PLA2G4A	0.676399	0.0129373
ENST00000356606	GPR64	0.645054	0.00397735		ENST00000273860	OCIAD2	0.673099	0.0113638
ENST00000290294	PRAC1	0.644863	0.000163714		ENST00000379789	PFKFB3	0.672925	0.000249589
ENST00000374490	HMGCL	0.644695	0.0479241		ENST00000314583	HCLS1	0.67252	0.0421723
ENST00000393399	PRCP	0.642598	0.0266505		ENST00000316310	FAM156A	0.668779	0.0130743
ENST00000335765	UNC119	0.639877	0.0384621		ENST00000337057	EPB41L2	0.668438	0.000242723
ENST00000375807	SECISBP2	0.639627	0.0234394		ENST00000216029	CBY1	0.667644	0.00284926
ENST00000299213	LARP6	0.637445	0.0290094		ENST00000373477	YARS	0.664185	0.0125441
ENST00000298743	GAS1	0.636875	1.69e-05		ENST00000237654	CCNI	0.662144	3.42e-06
ENST00000398158	CBS	0.634696	0.022986		ENST00000268603	CDH11	0.659613	0.0286477
ENST00000428026	PTPRU	0.633732	0.0222865		ENST00000374786	NTM	0.659334	0.0241193
ENST00000285930	AKR1B1	0.632441	9.39e-05		ENST00000249501	HOXD10	0.659077	0.00258105
ENST00000356413	IGBP1	0.632359	0.00120775		ENST00000409501	UXS1	0.657901	0.0185026
ENST00000246802	GLTSCR2	0.626806	0.0121473		ENST00000406189	MEX3C	0.656887	0.00626227
ENST00000374561	ID3	0.625383	1.36e-08		ENST00000529927	NDUFV1	0.654476	0.0255489
ENST00000355899	PLS3	0.625334	0.00164451		ENST00000409665	MORN2	0.653405	0.0464301
ENST00000354498	MAP2K5	0.625088	0.0234817		ENST00000261733	ALDH2	0.650024	0.00299853
ENST00000342228	SLC20A2	0.621227	0.0128468		ENST00000379453	ADRA1D	0.647827	5.89e-05
ENST00000337018	SUGP2	0.620904	0.0396816		ENST00000417663	C8orf59	0.647587	0.041362
ENST00000238647	IRF2BPL	0.619802	0.0306193		ENST00000355653	VAT1	0.647057	0.00471404
ENST00000367466	PLA2G4A	0.618992	0.0237659		ENST00000358907	R3HDM2	0.64602	0.0367083
ENST00000376390	PRAF2	0.618562	0.0178546		ENST00000451813	TRPC4AP	0.644925	0.044713
ENST00000340124	GPT2	0.61119	0.0478541		ENST00000397890	CRMP1	0.643565	0.00322417
ENST00000339950	USP1	0.609518	0.0140091		ENST00000396208	CCP110	0.640067	0.0481571
ENST00000261772	AARS	0.606614	0.00326673		ENST00000594999	MRPL34	0.639995	0.0377083
ENST00000328619	PCP4	0.601787	0.0533434		ENST00000254722	SERPINF1	0.638037	0.00836548
ENST00000441020	LANCL1	0.60143	0.0323903		ENST00000373872	TGIF2	0.63785	0.041607
ENST00000393784	ERGIC1	0.59878	0.0386147		ENST00000332797	CCDC28A	0.635997	0.0412203
ENST00000373290	TSPAN15	0.598226	0.0140451		ENST00000370206	CNN3	0.634696	0.00417189
ENST00000375036	MXRA7	0.597941	0.0341759		ENST00000349038	PTBP1	0.634363	0.0390338
ENST00000374786	NTM	0.592627	0.0444483		ENST00000286371	ATP1B3	0.631768	0.00288238
ENST00000268603	CDH11	0.591651	0.0516324		ENST00000406520	COMT	0.629304	0.0226765
ENST00000355621	UBE2H	0.589847	0.0485482		ENST00000222219	DNASE2	0.627862	0.00611007
ENST00000374315	SEPN1	0.588797	0.0498885		ENST00000216218	ST13	0.624882	6.27e-06
ENST00000370509	CREG1	0.5883	0.0518321		ENST00000346798	APP	0.624605	0.00212646
ENST00000429360	MPST	0.587174	0.00536522		ENST00000263245	ARFGAP3	0.622425	0.0215836
ENST00000216218	ST13	0.586226	2.33e-05		ENST00000216416	CNIH1	0.611571	0.00736614
ENST00000394975	VKORC1	0.58326	0.0250919		ENST00000243347	TNFAIP6	0.606708	2.05e-06
ENST00000309534	CGGBP1	0.58312	0.0147077		ENST00000376588	PSAT1	0.606707	0.0199163
ENST00000447750	GDI1	0.582698	0.00442035		ENST00000376390	PRAF2	0.601477	0.0219626
ENST00000361464	MGEA5	0.581182	0.0472103		ENST00000356413	IGBP1	0.599542	0.00229469
ENST00000336032	PNRC1	0.577443	0.0382357		ENST00000326427	ITM2C	0.595136	0.0361947
ENST00000374379	CLIC4	0.577057	0.000881908		ENST00000330836	DDX24	0.594944	0.0538058
ENST00000357991	GPR64	0.576474	0.0033448		ENST00000276692	TATDN1	0.594741	0.021221
ENST00000380636	TMSB4X	0.57632	0.0354368		ENST00000497164	MAGED4B	0.593155	0.0515458
ENST00000381174	XG	0.575873	0.000436915		ENST00000349777	SNAP23	0.590759	0.0046953
ENST00000455836	ERP29	0.575062	0.00594824		ENST00000399796	ATP6V1E1	0.587515	0.00319897
ENST00000354725	SND1	0.572942	0.00169026		ENST00000276297	DLC1	0.585764	0.0326117
ENST00000037243	GABARAPL2	0.570202	0.000104491		ENST00000339697	SERINC1	0.584783	0.00293707
ENST00000218348	USP11	0.567098	0.000226721		ENST00000255977	MKRN1	0.58443	0.0456922
ENST00000457918	HAX1	0.565219	0.0146433		ENST00000538964	CNN3	0.584159	0.00220211
ENST00000399798	ATP6V1E1	0.56509	0.0185409		ENST00000376112	ID1	0.584064	9.83e-05
ENST00000343115	RDX	0.560129	0.0152933		ENST00000378474	MID1IP1	0.582391	0.0204252
ENST00000206380	TMEM101	0.557661	0.0529056		ENST00000585933	CEBPG	0.581238	0.0491985
ENST00000587230	STX10	0.556274	0.0422768		ENST00000393399	PRCP	0.578437	0.0489439
ENST00000339697	SERINC1	0.556032	0.00474475		ENST00000356606	GPR64	0.570678	0.0111246
ENST00000411896	GRAMD1A	0.553478	0.01133		ENST00000329875	PYCR1	0.568493	0.00579697
ENST00000273860	OCIAD2	0.546977	0.0402126		ENST00000367651	CITED2	0.566775	7.44e-06
ENST00000371123	SMARCA1	0.543604	0.0434798		ENST00000369409	PHGDH	0.562277	0.000349193
ENST00000254722	SERPINF1	0.540374	0.0273015		ENST00000339950	USP1	0.560175	0.0250718
ENST00000567815	RPL13	0.540131	8.01e-07		ENST00000361927	COLGALT2	0.557748	0.0142461
ENST00000216029	CBY1	0.54003	0.0174588		ENST00000376495	OTUD1	0.553474	0.00302957
ENST00000232424	HES1	0.535091	0.00261538		ENST00000358171	SERPINH1	0.552691	0.00808896
ENST00000378470	FAM107B	0.532672	0.005677		ENST00000348502	ACSL4	0.552687	0.0486386
ENST00000343213	CAV2	0.532583	0.0136957		ENST00000373627	MTCH1	0.552537	0.0192818
ENST00000381323	FAM49A	0.531296	0.000845275		ENST00000243253	SEC61A1	0.552229	0.0328622
ENST00000264057	DGKD	0.531107	0.042849		ENST00000340385	PRDX6	0.551911	0.000993811
ENST00000237654	CCNI	0.528635	0.00025236		ENST00000380636	TMSB4X	0.550253	0.0459483
ENST00000265044	SSR3	0.52769	0.00165229		ENST00000295702	SSR2	0.548803	0.00550101
ENST00000218388	TIMP1	0.526831	0.00697791		ENST00000232424	HES1	0.54656	0.00212856
ENST00000232905	EIF1B	0.52584	0.0054297		ENST00000422285	PDHA1	0.533326	0.00346335
ENST00000234875	RPL22	0.525278	3.08e-06		ENST00000295962	ABHD6	0.532604	3.87e-05
ENST00000236273	SYF2	0.524834	0.046481		ENST00000234677	SARS	0.530437	0.0137846
ENST00000309311	EEF2	0.520313	5.42e-07		ENST00000338825	EIF4EBP1	0.523898	0.0151669
ENST00000451311	TMSB4X	0.519606	0.000714989		ENST00000266674	LGR5	0.52096	0.0183208
ENST00000322203	RPL10A	0.517995	0.000723903		ENST00000398073	CTDSP2	0.520635	0.00685896
ENST00000370508	GOT1	0.51764	0.0522771		ENST00000354725	SND1	0.516543	0.00502874
ENST00000448864	RPL35A	0.516394	0.000666748		ENST00000447750	GDI1	0.516389	0.0126632
ENST00000395566	MDK	0.515262	0.0201604		ENST00000280612	SLC7A11	0.515537	0.0542294
ENST00000330720	KDELR1	0.512346	0.00954163		ENST00000316660	PMAIP1	0.510563	0.0374815
ENST00000244766	NRN1	0.508553	0.0122907		ENST00000290551	BTG2	0.510281	0.00247267
ENST00000228740	LTA4H	0.500023	0.00534815		ENST00000343115	RDX	0.505	0.0297972
ENST00000295962	ABHD6	0.496719	0.000125793		ENST00000399103	PIGP	0.504449	0.0104979
ENST00000222266	PSENEN	0.496313	0.0141875		ENST00000374561	ID3	0.502674	5.92e-06
ENST00000373020	TSPAN6	0.495384	0.00448921		ENST00000379715	EEF1E1	0.501602	0.0211379
ENST00000354811	RPL15	0.491955	0.0314489		ENST00000262722	FBLN1	0.497041	0.00226039
ENST00000530705	TPT1	0.489951	0.00295628		ENST00000297142	NEUROD6	0.495662	0.00595041
ENST00000439561	COPB1	0.486581	0.0287247		ENST00000487273	ADAM9	0.490171	0.0263374
ENST00000366923	EPRS	0.477736	0.0262196		ENST00000218348	USP11	0.485216	0.00179056
ENST00000311893	ISCU	0.476956	0.00366873		ENST00000218388	TIMP1	0.48518	0.0131366
ENST00000447182	SDCBP	0.474138	0.00798244		ENST00000234875	RPL22	0.476793	2.59e-05
ENST00000335005	ITM2C	0.474009	0.000580025		ENST00000411896	GRAMD1A	0.470358	0.0337336
ENST00000399796	ATP6V1E1	0.471546	0.0192652		ENST00000373020	TSPAN6	0.469246	0.00737036
ENST00000216416	CNIH1	0.470999	0.041942		ENST00000330720	KDELR1	0.469048	0.0186255
ENST00000290551	BTG2	0.463439	0.00615974		ENST00000448276	SMARCD2	0.461786	0.0226964
ENST00000379789	PFKFB3	0.462464	0.012888		ENST00000395384	QPRT	0.459913	0.00960788
ENST00000399103	PIGP	0.461403	0.0196464		ENST00000261772	AARS	0.458607	0.0271126
ENST00000398073	CTDSP2	0.458948	0.017835		ENST00000589838	PRKCSH	0.457558	0.0224379
ENST00000546392	NACA	0.457398	0.00390857		ENST00000340006	CSRP1	0.44655	0.00900312
ENST00000309828	EIF3F	0.452784	0.00294339		ENST00000381317	ASMTL	0.44431	0.0514232
ENST00000376495	OTUD1	0.449877	0.0170326		ENST00000298743	GAS1	0.442024	0.00361614
ENST00000260443	RSL24D1	0.448906	0.00862851		ENST00000413364	LITAF	0.440661	0.017656
ENST00000297142	NEUROD6	0.447957	0.0131787		ENST00000265044	SSR3	0.436351	0.0103067
ENST00000494801	TCEAL4	0.445315	0.0523202		ENST00000371674	UBE2V1	0.436163	0.0237554
ENST00000349777	SNAP23	0.443311	0.0370918		ENST00000054950	RCN1	0.432962	0.0146223
ENST00000448276	SMARCD2	0.443292	0.0287562		ENST00000252818	JUND	0.432574	0.0142152
ENST00000379715	EEF1E1	0.438836	0.0447402		ENST00000037243	GABARAPL2	0.428627	0.00418319
ENST00000391857	RPL13A	0.43736	0.000932951		ENST00000251020	SALL1	0.427996	0.0215076
ENST00000593863	RPS19	0.435436	0.0178302		ENST00000260443	RSL24D1	0.420875	0.0140497
ENST00000014930	HEBP1	0.434642	0.0145996		ENST00000374379	CLIC4	0.414708	0.018591
ENST00000530797	RPLP2	0.430246	0.00517494		ENST00000394689	BRD7	0.414314	0.0199368
ENST00000329251	EEF1G	0.427288	4.53e-05		ENST00000222266	PSENEN	0.407156	0.0461379
ENST00000053867	GRN	0.427125	0.0467183		ENST00000379942	PHKA2	0.398596	0.0196078
ENST00000371674	UBE2V1	0.423887	0.027873		ENST00000367334	TMEM9	0.3982	0.0238349
ENST00000380394	RPS6	0.420267	0.00100495		ENST00000429029	DNAJB6	0.398119	0.0256867
ENST00000325509	MSC	0.41943	1.18e-06		ENST00000325509	MSC	0.391729	6.03e-06
ENST00000241337	GSTM2	0.418875	0.0222582		ENST00000309828	EIF3F	0.388527	0.0114966
ENST00000302278	ITGB1	0.418577	0.00261184		ENST00000451311	TMSB4X	0.384595	0.0121874
ENST00000361575	RPL39	0.418302	0.00306245		ENST00000232905	EIF1B	0.383054	0.0476386
ENST00000580261	RPL17	0.415195	1.94e-05		ENST00000536605	MYL12A	0.382803	0.0484779
ENST00000341772	DNER	0.413606	0.0460365		ENST00000253039	EIF2S3	0.382706	0.00165209
ENST00000228306	RPLP0	0.410297	0.00753776		ENST00000526054	VPS28	0.370184	0.0495704
ENST00000406376	RPS7	0.405076	0.0234202		ENST00000220849	EIF3E	0.36985	0.0104505
ENST00000381401	SLC25A6	0.404663	0.0015945		ENST00000381323	FAM49A	0.354347	0.0296691
ENST00000361436	RPL12	0.403011	0.014244		ENST00000329251	EEF1G	0.351806	0.000796679
ENST00000374550	RPL11	0.402149	0.015983		ENST00000322203	RPL10A	0.350394	0.0222275
ENST00000368567	RPS27	0.401626	0.00112243		ENST00000335005	ITM2C	0.340843	0.0142117
ENST00000422285	PDHA1	0.400178	0.0305195		ENST00000270776	PGD	0.334441	0.00583026
ENST00000301843	CTTN	0.399224	0.0396246		ENST00000265174	PAPSS1	0.330618	0.0333867
ENST00000295702	SSR2	0.398801	0.0458166		ENST00000335181	PKM	0.330448	0.00228828
ENST00000221418	ECH1	0.39862	0.028017		ENST00000537981	RTN3	0.3284	0.038466
ENST00000589838	PRKCSH	0.397514	0.0484777		ENST00000558815	RPL28	0.317873	0.0440397
ENST00000394667	RPL34	0.397369	0.00557951		ENST00000309311	EEF2	0.315857	0.00241558
ENST00000251453	RPS16	0.396711	0.0197845		ENST00000452445	NELL2	0.31393	0.0228957
ENST00000405442	EIF3D	0.390564	0.00967375		ENST00000272102	ARF1	0.301954	0.007216
ENST00000253039	EIF2S3	0.390172	0.00131347		ENST00000405442	EIF3D	0.300823	0.0484724
ENST00000222247	RPL18A	0.386273	0.0195082		ENST00000338094		0.293734	0.0381539
ENST00000340006	CSRP1	0.386029	0.0246481		ENST00000329421	MARCKSL1	0.289162	0.018922
ENST00000579649	RPL36	0.384244	0.006671		ENST00000299767	HSP90B1	0.282139	0.0307472
ENST00000355801	COMMD6	0.379997	0.0304566		ENST00000316084	RPS4X	0.268813	0.0219447
ENST00000316084	RPS4X	0.37907	0.00119919		ENST00000451270	ANXA2	0.264077	0.0164397
ENST00000220849	EIF3E	0.378131	0.00865514		ENST00000381187	CD99	0.259982	0.0128273
ENST00000521466	RPS14	0.378032	0.0157952		ENST00000422840	GLG1	0.255559	0.0391857
ENST00000332707	XPOT	0.375001	0.049738		ENST00000320334	OLFML3	0.237334	0.0387691
ENST00000321153	RPLP2	0.366108	0.0304695		ENST00000257497	ANXA1	0.227371	0.0489789
ENST00000234301	COX7A2L	0.364499	0.0195695		ENST00000227507	CCND1	0.218501	0.0425081
ENST00000272102	ARF1	0.360143	0.00126231		ENST00000300933	TPM4	0.190691	0.0525275
ENST00000287038	RPL30	0.359926	0.0253404		ENST00000374291	STMN1	-0.244665	0.0297643
ENST00000249042	TST	0.35325	0.0443325		ENST00000578611	MYL12A	-0.265136	0.0535264
ENST00000252818	JUND	0.350725	0.0487297		ENST00000517671	NPM1	-0.26908	0.0273506
ENST00000260379	RPLP1	0.347953	0.0188127		ENST00000322611	BASP1	-0.280454	0.0343251
ENST00000537981	RTN3	0.347924	0.0277232		ENST00000308987	CKS1B	-0.296832	0.0345328
ENST00000245458	RPS29	0.347907	0.028377		ENST00000298510	PRDX3	-0.304442	0.00733029
ENST00000224073	EDF1	0.344971	0.0301767		ENST00000341423	HMGB1	-0.32211	0.015019
ENST00000366607	TOMM20	0.343836	0.0118952		ENST00000216281	HSP90AA1	-0.334821	0.0451312
ENST00000430157	UBA52	0.34225	0.0260695		ENST00000356493	STOML2	-0.33983	0.0373555
ENST00000377142	NKX2-2	0.342172	0.0447656		ENST00000264639	PSMD3	-0.340589	0.0422865
ENST00000225430	RPL19	0.340022	0.0169215		ENST00000261313	PEBP1	-0.340757	0.00631793
ENST00000175091	LAPTM4A	0.327018	0.0463739		ENST00000277010	SIGMAR1	-0.341506	0.0500213
ENST00000563390	RPS15A	0.326109	0.0293812		ENST00000221486	RNASEH2A	-0.347908	0.0228598
ENST00000402285	RPS27A	0.325786	0.0531266		ENST00000540844	CCT8	-0.352003	0.0423702
ENST00000196551	RPS5	0.324656	0.021517		ENST00000296102	MRPL33	-0.352594	0.0541662
ENST00000338094		0.324275	0.0212832		ENST00000296417	H2AFZ	-0.359854	0.0464023
ENST00000270776	PGD	0.320747	0.00816758		ENST00000376957	SRM	-0.363021	0.0497454
ENST00000439590	RPL38	0.319869	0.023946		ENST00000373616	MTCH1	-0.372229	0.0511746
ENST00000320334	OLFML3	0.316554	0.00556637		ENST00000272427	EXOC6B	-0.379037	0.0401051
ENST00000340913	HNRNPA1	0.312682	0.0326895		ENST00000007516	NDUFAB1	-0.380819	0.0391864
ENST00000326199	RPS10	0.304321	0.0305208		ENST00000370873	PSMA7	-0.382843	0.0196191
ENST00000381187	CD99	0.303398	0.0035847		ENST00000318911	CYC1	-0.384446	0.00590386
ENST00000357790	RPLP1	0.296892	2.71e-05		ENST00000265056	MCM2	-0.387196	0.035634
ENST00000335895	BTF3	0.283813	0.0289571		ENST00000366839	SRP9	-0.388011	0.0498124
ENST00000323345	RPL7A	0.275268	0.0384917		ENST00000397239	DEK	-0.393513	0.0305184
ENST00000422840	GLG1	0.271934	0.0278128		ENST00000322723	NCL	-0.393866	0.0138933
ENST00000552981	SLC25A3	0.26523	0.0501005		ENST00000395422	CHCHD2	-0.399422	0.0138927
ENST00000373841	NONO	0.263998	0.0121735		ENST00000401406	UQCR10	-0.399891	0.0484841
ENST00000400137	FKBP1A	0.256636	0.0454092		ENST00000356714	NUDT1	-0.400713	0.0474783
ENST00000451270	ANXA2	0.248838	0.0237525		ENST00000229238	MRPL51	-0.400949	0.0350236
ENST00000335181	PKM	0.231117	0.0332476		ENST00000381342	SNRPB	-0.40211	0.0212077
ENST00000373232	PPA1	0.222335	0.044907		ENST00000399494	HMGB1	-0.403374	0.00424185
ENST00000227507	CCND1	0.213595	0.0471855		ENST00000303305	PA2G4	-0.403915	0.0245614
ENST00000381192	CD99	0.174687	0.0539112		ENST00000305885	FEN1	-0.41073	0.051124
ENST00000345042	HSPD1	-0.23785	0.0333677		ENST00000350021	NDUFB6	-0.412907	0.0484759
ENST00000374291	STMN1	-0.28395	0.0117297		ENST00000309579	USMG5	-0.413038	0.0354389
ENST00000221486	RNASEH2A	-0.292405	0.0535193		ENST00000251413	TUBG1	-0.414602	0.0357961
ENST00000234590	ENO1	-0.299186	0.0111443		ENST00000336452	EIF5A	-0.416561	0.0347165
ENST00000308987	CKS1B	-0.314428	0.0251494		ENST00000221494	SF3A2	-0.417613	0.0416369
ENST00000303577	PCBP1	-0.317481	0.0290588		ENST00000368097	TAGLN2	-0.420709	0.0134646
ENST00000298510	PRDX3	-0.32088	0.0046951		ENST00000508530	DYNC1I2	-0.42124	0.0437426
ENST00000353341	HNRNPD	-0.342948	0.0257314		ENST00000304312	ATP5I	-0.421726	0.0347912
ENST00000356674	HNRNPA2B1	-0.34351	0.0110028		ENST00000233078	DAZAP1	-0.422616	0.0319477
ENST00000248975	YWHAH	-0.347841	0.0284961		ENST00000216225	RBX1	-0.423817	0.0175939
ENST00000317881	SLC25A5	-0.348536	0.000609935		ENST00000300408	PHB	-0.425602	0.054287
ENST00000303305	PA2G4	-0.352417	0.0480783		ENST00000438607	TMA7	-0.433856	0.0210549
ENST00000407004	ILF3	-0.358699	0.0284741		ENST00000300403	TPX2	-0.434327	0.0265561
ENST00000216225	RBX1	-0.362748	0.0403325		ENST00000322213	SMC1A	-0.440944	0.0442428
ENST00000225698	C1QBP	-0.365914	0.0382829		ENST00000409115	PTMA	-0.444248	0.00830533
ENST00000331821	RANBP1	-0.371078	0.0109992		ENST00000284971	ATP5J	-0.44595	0.0141078
ENST00000265056	MCM2	-0.37309	0.0420518		ENST00000425753	TSTA3	-0.447387	0.0547707
ENST00000409115	PTMA	-0.377412	0.0246258		ENST00000317881	SLC25A5	-0.448314	1.28e-05
ENST00000318911	CYC1	-0.378298	0.00660202		ENST00000225698	C1QBP	-0.451367	0.0112032
ENST00000394601	PTBP1	-0.396351	0.0533041		ENST00000269321	ARHGDIA	-0.453045	0.00709472
ENST00000304786	SRP9	-0.397129	0.00740476		ENST00000288207	CCNB2	-0.453113	0.00998795
ENST00000321358	YBX1	-0.397954	0.00155849		ENST00000404735	RPS27A	-0.461304	0.015483
ENST00000225655	PFN1	-0.398018	0.00707526		ENST00000331821	RANBP1	-0.461389	0.00169738
ENST00000376692	MAD2L2	-0.399271	0.0509797		ENST00000319248	PRDX1	-0.46292	0.044503
ENST00000341423	HMGB1	-0.401096	0.00257442		ENST00000388968	HSPD1	-0.464357	0.0348564
ENST00000331789	ACTB	-0.401807	0.03545		ENST00000370355	SCD	-0.465329	0.0303293
ENST00000225174	PPIF	-0.413593	0.0458379		ENST00000530628	CDKN2A	-0.466529	0.0149832
ENST00000272427	EXOC6B	-0.425334	0.0217467		ENST00000321358	YBX1	-0.467386	0.00021344
ENST00000305885	FEN1	-0.431785	0.0403861		ENST00000355857	DBI	-0.470273	0.0355766
ENST00000343380	E2F1	-0.436732	0.0318318		ENST00000556029	TMPO	-0.474905	0.00435785
ENST00000392006	HNRNPUL1	-0.437028	0.0287875		ENST00000298585	ZMYND19	-0.475277	0.0440432
ENST00000215754	MIF	-0.441543	0.0257535		ENST00000216605	MTHFD1	-0.478685	0.0321932
ENST00000558813	DUT	-0.443448	0.0190914		ENST00000225655	PFN1	-0.484545	0.00111729
ENST00000358002	DYNC1I2	-0.443515	0.043134		ENST00000260102	MRPL15	-0.486328	0.00855433
ENST00000537798	NASP	-0.444126	0.0511412		ENST00000396861	GAPDH	-0.487996	0.00307393
ENST00000356244	RANGAP1	-0.445275	0.0197537		ENST00000360000	TCEAL8	-0.488675	0.0531915
ENST00000404735	RPS27A	-0.446952	0.018621		ENST00000333676	MRPL12	-0.488929	0.0130078
ENST00000399494	HMGB1	-0.447068	0.00155141		ENST00000373298	ITM2A	-0.491415	0.03576
ENST00000350997	FADS1	-0.448661	0.0118805		ENST00000229379	COX6A1	-0.493393	0.0155273
ENST00000160827	KIF22	-0.452138	0.0420552		ENST00000426324	APRT	-0.494566	0.0357814
ENST00000455785	STMN1	-0.456817	0.00199725		ENST00000379341	PRDX4	-0.496602	0.00945392
ENST00000334828	PGAM1	-0.461601	0.00466372		ENST00000271002	ITGB3BP	-0.497216	0.0455549
ENST00000296417	H2AFZ	-0.462945	0.0107338		ENST00000395663	ATP5E	-0.498936	0.00788089
ENST00000405636	TOMM40	-0.4666	0.0284682		ENST00000455785	STMN1	-0.501703	0.000738406
ENST00000223864	PLGRKT	-0.474191	0.0451586		ENST00000499788	RPP25	-0.502136	0.0200485
ENST00000573542	EIF5A	-0.48297	0.00532782		ENST00000378667	UQCRQ	-0.506943	0.00767077
ENST00000216281	HSP90AA1	-0.483808	0.00399699		ENST00000299736	CENPV	-0.510129	0.0377537
ENST00000404898	CACNA1I	-0.485819	0.0239142		ENST00000234590	ENO1	-0.510261	1.71e-05
ENST00000430553	LDHA	-0.486458	0.0126114		ENST00000394186	ATP5J2	-0.510765	0.00790466
ENST00000372435	PRPS1	-0.489458	0.0279272		ENST00000317669	SLC38A5	-0.512129	0.0413112
ENST00000283006	CENPH	-0.492803	0.0406766		ENST00000334828	PGAM1	-0.51499	0.00165998
ENST00000306749	FASN	-0.499219	0.04615		ENST00000498926	PGAM5	-0.518401	0.0440389
ENST00000352433	PTTG1	-0.504546	0.0309808		ENST00000225174	PPIF	-0.522941	0.013246
ENST00000521291	RPL30	-0.504891	0.0508887		ENST00000252288	GAMT	-0.524133	0.0240855
ENST00000379412	LDHA	-0.511282	0.0027125		ENST00000330263	MRTO4	-0.532751	0.01324
ENST00000396705	TPI1	-0.511927	0.000297571		ENST00000247866	NDUFB2	-0.533532	0.0328135
ENST00000381883	PPAPDC2	-0.512313	0.0221612		ENST00000381125	PFKP	-0.533863	0.0151889
ENST00000368097	TAGLN2	-0.520396	0.00242947		ENST00000256686	TMEM106C	-0.535223	0.0392273
ENST00000505490	ALYREF	-0.522579	0.00951768		ENST00000396705	TPI1	-0.535999	0.000162713
ENST00000299736	CENPV	-0.523989	0.0326936		ENST00000368467	PMVK	-0.536165	0.0546816
ENST00000379059	POLA1	-0.526932	0.0370473		ENST00000344726	HMGN3	-0.538207	0.0403611
ENST00000300403	TPX2	-0.527259	0.00770644		ENST00000223864	PLGRKT	-0.539102	0.0245886
ENST00000287025	MTERFD1	-0.528352	0.0543368		ENST00000216639	VRK1	-0.539985	0.0189909
ENST00000370355	SCD	-0.529582	0.0141786		ENST00000368259	CCT3	-0.540848	0.0398831
ENST00000359832	ATP5J2	-0.530832	0.0108477		ENST00000359832	ATP5J2	-0.541945	0.00959322
ENST00000380071	RFC3	-0.531209	0.0484299		ENST00000378970	NR0B1	-0.547859	0.0129785
ENST00000272298	CALM2	-0.539022	0.0226889		ENST00000355300	LINGO1	-0.548412	0.0511818
ENST00000343255	SRSF10	-0.540271	0.0358484		ENST00000272298	CALM2	-0.549461	0.0206949
ENST00000373408	CCDC167	-0.545405	0.0197259		ENST00000372435	PRPS1	-0.551516	0.0144018
ENST00000301634	TK1	-0.545446	0.00469709		ENST00000368858	BUB3	-0.551621	0.01543
ENST00000251074	NUP37	-0.545836	0.0540879		ENST00000269593	IGFBP4	-0.552359	0.0301013
ENST00000249806	CLN6	-0.545853	0.0232368		ENST00000319769	B4GALT3	-0.553991	0.0341148
ENST00000310544	PHOSPHO1	-0.551879	0.0442603		ENST00000537798	NASP	-0.557881	0.0161544
ENST00000301740	SRRM2	-0.563763	0.0151842		ENST00000261597	NDC80	-0.557983	0.0228894
ENST00000393193	NME2	-0.565087	0.0169226		ENST00000377595	UCHL3	-0.55888	0.0453323
ENST00000264552	UBE2S	-0.567674	0.000102596		ENST00000359995	SRSF2	-0.560641	0.0075939
ENST00000367879	UCK2	-0.567742	0.042741		ENST00000327892	TUBB	-0.561593	0.00865649
ENST00000341369	PTMA	-0.571878	0.000995428		ENST00000379143	PCNA	-0.561836	0.000305819
ENST00000288207	CCNB2	-0.572168	0.00132073		ENST00000296277	RPL39L	-0.562595	0.0241536
ENST00000375370	TFDP1	-0.573803	0.00803793		ENST00000290810	NAE1	-0.567002	0.0390152
ENST00000609618		-0.580092	0.0235004		ENST00000329967	SIVA1	-0.567435	0.0242653
ENST00000377595	UCHL3	-0.590474	0.0348219		ENST00000306749	FASN	-0.568978	0.0249344
ENST00000240488	MND1	-0.594078	0.0476138		ENST00000312377	RACGAP1	-0.569748	0.0228895
ENST00000287394	ATAD2	-0.594765	0.0306075		ENST00000287394	ATAD2	-0.570849	0.0378537
ENST00000216639	VRK1	-0.599785	0.00959388		ENST00000372642	ENDOG	-0.573253	0.0506547
ENST00000429709	ACTL6A	-0.600311	0.0433905		ENST00000394601	PTBP1	-0.576802	0.00587335
ENST00000393366	ATP5G1	-0.604685	0.0158298		ENST00000424576	RPL6	-0.578573	0.0543925
ENST00000413382	PSMA4	-0.604687	0.00961153		ENST00000311672	UQCRH	-0.579345	0.0193469
ENST00000347703	CDCA7	-0.605799	0.0243425		ENST00000434436	MBD3	-0.582888	0.0116133
ENST00000598441	SNRNP70	-0.606386	0.0443799		ENST00000375370	TFDP1	-0.583493	0.00727225
ENST00000315579	NCAPD2	-0.607131	0.0257785		ENST00000270225	SAE1	-0.58556	0.0107305
ENST00000276533	GINS4	-0.611104	0.0337665		ENST00000356244	RANGAP1	-0.586468	0.00267158
ENST00000359995	SRSF2	-0.612036	0.00365794		ENST00000229758	FBXO5	-0.59053	0.0482556
ENST00000361427	HMGN2	-0.616929	0.000247163		ENST00000433898	NDUFB3	-0.591242	0.00147145
ENST00000308153	H2AFV	-0.617864	0.00154243		ENST00000323274	TYMS	-0.59465	0.0419053
ENST00000379143	PCNA	-0.627868	5.78e-05		ENST00000236957	EEF1B2	-0.595087	0.0404882
ENST00000600873	HNRNPL	-0.628148	0.000244986		ENST00000314355	CKS2	-0.59601	1.91e-05
ENST00000296504	SAP30	-0.6293	0.0188024		ENST00000219066	NTHL1	-0.597376	0.0430274
ENST00000248098	HN1L	-0.63584	0.0257003		ENST00000320270	RRS1	-0.601462	0.0334239
ENST00000359843	FOXM1	-0.637412	0.0144994		ENST00000373408	CCDC167	-0.601827	0.0109062
ENST00000375377	KIAA1462	-0.64322	0.00459732		ENST00000378060	VPS36	-0.612061	0.0269146
ENST00000414849	NUSAP1	-0.644538	0.0169975		ENST00000503431	UCHL1	-0.615096	0.00909423
ENST00000396148	CDKN2C	-0.647024	0.0166178		ENST00000407721	DHCR7	-0.616348	0.0466835
ENST00000261597	NDC80	-0.650267	0.00873724		ENST00000421109	NR2F2	-0.616506	0.0319083
ENST00000336023	TUBA1B	-0.653265	1.11e-10		ENST00000505490	ALYREF	-0.618493	0.00240603
ENST00000513063	MXD3	-0.65543	0.0319477		ENST00000372224	KIF2C	-0.620263	0.0261605
ENST00000306306	REEP4	-0.656681	0.0213617		ENST00000347617	HMGA1	-0.622507	0.000219809
ENST00000369119	ANP32E	-0.658038	0.0239611		ENST00000362034	MRPL21	-0.624525	0.00984759
ENST00000236957	EEF1B2	-0.658476	0.0241401		ENST00000558813	DUT	-0.625284	0.0012424
ENST00000209728	CDC6	-0.658995	0.0193938		ENST00000356457	ASPH	-0.629051	0.0256959
ENST00000275732	GIGYF1	-0.659017	0.0453866		ENST00000160827	KIF22	-0.637014	0.00540413
ENST00000258884	ABHD17C	-0.659851	0.0380934		ENST00000366955	CENPF	-0.637329	0.0196152
ENST00000353598	MRPS11	-0.661665	0.0392451		ENST00000372360	RPS24	-0.637421	0.0351627
ENST00000230056	GMNN	-0.670934	0.013066		ENST00000414849	NUSAP1	-0.637908	0.0183079
ENST00000356509	GMNN	-0.675136	0.0396442		ENST00000405636	TOMM40	-0.639739	0.00343021
ENST00000261881	TIPIN	-0.676213	0.0539115		ENST00000298556	HPRT1	-0.643389	0.00142249
ENST00000518171	COX6C	-0.678368	0.0300082		ENST00000320033	ARL4D	-0.64882	0.0210041
ENST00000537289	COA4	-0.67916	0.0347302		ENST00000395405	ZWINT	-0.65054	0.0409098
ENST00000254193	SNRPA1	-0.682843	0.0126215		ENST00000306306	REEP4	-0.651524	0.0227549
ENST00000314355	CKS2	-0.687066	9.53e-07		ENST00000369798	TTK	-0.652983	0.0305427
ENST00000372715	WDR34	-0.688074	2.12e-05		ENST00000447866	FDPS	-0.653766	0.0139286
ENST00000272542	SLC20A1	-0.690358	0.037211		ENST00000372715	WDR34	-0.655127	5.03e-05
ENST00000339901	SECISBP2	-0.690484	0.0465881		ENST00000381344	IDI1	-0.656642	0.0178195
ENST00000322213	SMC1A	-0.691578	0.00230029		ENST00000573542	EIF5A	-0.659358	0.000183083
ENST00000301072	TUBA1C	-0.696127	8.61e-08		ENST00000534548	NCAPD3	-0.660227	0.0362124
ENST00000312037	RPS14	-0.698216	0.0401529		ENST00000215754	MIF	-0.663554	0.00110121
ENST00000320805	NFATC2IP	-0.702355	0.0374731		ENST00000371356	AURKA	-0.663759	0.00936606
ENST00000540021	MSH6	-0.703854	0.012879		ENST00000326729	GSTM4	-0.675913	0.0194319
ENST00000409409	CYCS	-0.706915	0.00412402		ENST00000238618	ACYP1	-0.6771	0.0311328
ENST00000321394	TCP1	-0.708431	0.0149215		ENST00000359692	DNM2	-0.680728	0.0406174
ENST00000321765	SPAG5	-0.708502	0.0140998		ENST00000264552	UBE2S	-0.682567	4.16e-06
ENST00000217026	MYBL2	-0.709676	0.000262538		ENST00000455976	DUT	-0.683089	0.0374984
ENST00000372642	ENDOG	-0.714179	0.0171133		ENST00000358715	HMMR	-0.683874	0.0262225
ENST00000379160	PCNA	-0.714893	0.0534153		ENST00000597436	CCDC124	-0.686911	0.0170739
ENST00000530167	H2AFX	-0.715153	0.000202625		ENST00000396521	EXOSC3	-0.687737	0.0258547
ENST00000394249	PRC1	-0.716297	0.000307453		ENST00000361059	MATR3	-0.694376	0.036162
ENST00000268099	SCAMP2	-0.7168	0.034369		ENST00000358002	DYNC1I2	-0.694574	0.00236415
ENST00000371224	ALDH18A1	-0.71839	0.025207		ENST00000430553	LDHA	-0.695027	0.000471706
ENST00000372224	KIF2C	-0.720124	0.0107489		ENST00000300035	KIAA0101	-0.695495	0.0149599
ENST00000367274	UBE2T	-0.722679	0.000145446		ENST00000379412	LDHA	-0.698127	6.37e-05
ENST00000376687	SUV39H1	-0.727693	0.0328312		ENST00000222307	KXD1	-0.705155	0.0114728
ENST00000381344	IDI1	-0.738273	0.00826509		ENST00000314752	SULT1A1	-0.70754	0.0127325
ENST00000370790	FAM122B	-0.740066	0.0296922		ENST00000295886	NKX6-1	-0.712356	0.034481
ENST00000293872	LUC7L	-0.740728	0.0411859		ENST00000361427	HMGN2	-0.71382	2.35e-05
ENST00000260731	KIF11	-0.740792	0.00850425		ENST00000301634	TK1	-0.714042	0.000315492
ENST00000229251	COPS7A	-0.743368	0.0358737		ENST00000333039	NPTXR	-0.715896	0.0375819
ENST00000262146	MTFR1	-0.745043	0.0288768		ENST00000262315	CHTF18	-0.724626	0.0309259
ENST00000256686	TMEM106C	-0.746399	0.00523145		ENST00000397416	ROMO1	-0.727992	0.0142499
ENST00000282074	SPC25	-0.748712	0.00744524		ENST00000340384	TUBB4B	-0.729191	2.76e-06
ENST00000368107	DUSP23	-0.74897	0.0435011		ENST00000221496	AMH	-0.72934	0.0199806
ENST00000340384	TUBB4B	-0.754544	1.24e-06		ENST00000419711	EIF5A	-0.729364	0.0116209
ENST00000317702	TUBB6	-0.758159	0.00152296		ENST00000249806	CLN6	-0.730963	0.00324328
ENST00000361170	IQGAP3	-0.759467	0.0405838		ENST00000393193	NME2	-0.733143	0.0021774
ENST00000584164	RPL26	-0.763069	0.0356461		ENST00000308153	H2AFV	-0.733733	0.000210524
ENST00000298556	HPRT1	-0.763333	0.000190483		ENST00000310544	PHOSPHO1	-0.735786	0.00963906
ENST00000356455	UBE2C	-0.767039	5.45e-06		ENST00000269159	IMPA2	-0.737734	0.0107017
ENST00000426395	FCGRT	-0.770732	0.00700569		ENST00000220325	EHD4	-0.738548	0.0279108
ENST00000369798	TTK	-0.771536	0.0119906		ENST00000301072	TUBA1C	-0.739123	1.62e-08
ENST00000380420	PIR	-0.773891	0.00247704		ENST00000272542	SLC20A1	-0.741197	0.0271439
ENST00000270225	SAE1	-0.775666	0.000954608		ENST00000330459	KPNA2	-0.741808	0.000112763
ENST00000262460	GINS1	-0.779022	0.0126484		ENST00000372919	ANXA7	-0.742364	0.0213312
ENST00000327331	CDCA8	-0.781567	0.0232805		ENST00000310955	CDC20	-0.743074	2.83e-05
ENST00000375120	OTUD3	-0.785214	0.0487026		ENST00000429260	C9orf116	-0.74425	0.0424392
ENST00000423485	TOP2A	-0.787134	1.6e-05		ENST00000262460	GINS1	-0.747189	0.0165573
ENST00000408918	CCNL2	-0.790357	0.00748764		ENST00000361951	DARS2	-0.75071	0.0339231
ENST00000393860	RAB5C	-0.793003	0.0339865		ENST00000336023	TUBA1B	-0.754469	1.19e-13
ENST00000251413	TUBG1	-0.793199	0.00013674		ENST00000309061	DUS3L	-0.755002	0.018153
ENST00000457309	YWHAZ	-0.794921	0.0286712		ENST00000370790	FAM122B	-0.756063	0.0272994
ENST00000330459	KPNA2	-0.795847	3.71e-05		ENST00000250495	NEDD8	-0.758197	0.012548
ENST00000289166	FAM46B	-0.797738	0.0154153		ENST00000521291	RPL30	-0.760089	0.00446325
ENST00000262293	PRR11	-0.798081	0.0432328		ENST00000216127	RASD2	-0.760793	0.0386206
ENST00000221419	HNRNPL	-0.801097	0.036664		ENST00000398958	RCC1	-0.762376	0.00622122
ENST00000597436	CCDC124	-0.802422	0.0058832		ENST00000341942	LAMTOR4	-0.763425	0.00780071
ENST00000438704	HMGB2	-0.80389	4.31e-05		ENST00000380420	PIR	-0.764357	0.00284515
ENST00000373852	C20orf24	-0.804855	0.0521263		ENST00000217026	MYBL2	-0.764682	9.98e-05
ENST00000361627	ARHGAP11A	-0.804987	0.0198524		ENST00000304567	RRM2	-0.767001	0.000192379
ENST00000356657	FDPS	-0.807693	0.0504901		ENST00000220514	OIP5	-0.768992	0.0124361
ENST00000489288	RHNO1	-0.817007	0.00668333		ENST00000354558	CKAP5	-0.769418	0.0460227
ENST00000263382	ASF1B	-0.819937	0.00342897		ENST00000370025	PRPF38B	-0.775662	0.0316254
ENST00000310955	CDC20	-0.825001	3.99e-06		ENST00000319285	DCTPP1	-0.775664	0.0460652
ENST00000382891	WHSC1	-0.826762	0.00353275		ENST00000394249	PRC1	-0.775979	0.000109867
ENST00000304567	RRM2	-0.827342	6.35e-05		ENST00000413454	NUP62	-0.776477	0.0226199
ENST00000452918	SUGP2	-0.8309	0.0374171		ENST00000367274	UBE2T	-0.777981	4.95e-05
ENST00000529106	WDR74	-0.832982	0.0408196		ENST00000265000	GALNT7	-0.779408	0.0482665
ENST00000313288	TACC3	-0.83368	0.00153771		ENST00000315579	NCAPD2	-0.779758	0.00562166
ENST00000534548	NCAPD3	-0.843022	0.00931963		ENST00000317702	TUBB6	-0.782209	0.0011411
ENST00000265748	ANLN	-0.844632	0.0488024		ENST00000166345	TRIP13	-0.786321	0.019164
ENST00000166345	TRIP13	-0.84465	0.0124322		ENST00000336219	CDCA4	-0.786322	0.0223141
ENST00000374403	KIF4A	-0.846027	0.00199746		ENST00000537289	COA4	-0.789999	0.0158175
ENST00000371356	AURKA	-0.849875	0.00117128		ENST00000374793	SMC2	-0.791046	0.0363204
ENST00000221496	AMH	-0.852904	0.00752585		ENST00000341991	NADK	-0.792499	0.0174714
ENST00000250056	FAM64A	-0.854972	0.00373426		ENST00000396148	CDKN2C	-0.79325	0.0043052
ENST00000379643	MAP7D2	-0.856512	0.00623885		ENST00000489288	RHNO1	-0.797188	0.00814006
ENST00000257931	PAN2	-0.856674	0.0405795		ENST00000274026	CCNA2	-0.800162	0.000698561
ENST00000366955	CENPF	-0.859529	0.002341		ENST00000382891	WHSC1	-0.801264	0.00465999
ENST00000368809	S100A10	-0.867366	0.00187936		ENST00000263382	ASF1B	-0.802384	0.00420054
ENST00000328514	GINS3	-0.867816	0.048366		ENST00000220584	FDFT1	-0.806177	0.0249124
ENST00000361757	SBNO2	-0.86827	0.0416274		ENST00000296504	SAP30	-0.808539	0.00340299
ENST00000545638	NCKAP1L	-0.871364	0.053475		ENST00000361729	E2F2	-0.808869	0.0118524
ENST00000211314	TMEM14A	-0.873255	0.0405247		ENST00000368356	FDPS	-0.809531	0.0228124
ENST00000250495	NEDD8	-0.875706	0.0043229		ENST00000260731	KIF11	-0.811108	0.00456691
ENST00000502762	HNRNPDL	-0.884609	0.0113905		ENST00000409409	CYCS	-0.819198	0.00103694
ENST00000358715	HMMR	-0.884613	0.00532331		ENST00000010404	MGST1	-0.822265	0.0218801
ENST00000369764	OBFC1	-0.885229	0.014093		ENST00000393366	ATP5G1	-0.822275	0.00148957
ENST00000399976	USP16	-0.889869	0.0291861		ENST00000368325	CENPW	-0.82286	0.000349768
ENST00000220514	OIP5	-0.890331	0.00445913		ENST00000215980	CENPM	-0.823729	0.000292892
ENST00000260363	KIF23	-0.890362	0.00119524		ENST00000322028	POLR2L	-0.826683	0.0516405
ENST00000446922	HMGB2	-0.890399	3.68e-06		ENST00000447513	PEX10	-0.826978	0.0257973
ENST00000416651	NIF3L1	-0.899461	0.0241618		ENST00000313288	TACC3	-0.829905	0.00166032
ENST00000371566	ORC1	-0.904436	0.0534462		ENST00000513063	MXD3	-0.830544	0.00835168
ENST00000413454	NUP62	-0.904952	0.00911313		ENST00000250056	FAM64A	-0.830858	0.004806
ENST00000356309	NCAPG2	-0.911391	0.0304108		ENST00000441499	TNPO2	-0.83196	0.0144176
ENST00000596655	C19orf48	-0.914861	0.018301		ENST00000262302	NUBP2	-0.834154	0.0172505
ENST00000578550	ANAPC11	-0.915652	0.0408588		ENST00000438704	HMGB2	-0.837734	2.11e-05
ENST00000300035	KIAA0101	-0.920702	0.00187896		ENST00000277900	ADD3	-0.839694	0.0375325
ENST00000375940	MASTL	-0.922753	0.0251944		ENST00000426395	FCGRT	-0.840044	0.0038084
ENST00000275517	CDCA5	-0.928841	0.000689261		ENST00000327331	CDCA8	-0.840374	0.0161188
ENST00000585124	AURKB	-0.932966	0.00104751		ENST00000265748	ANLN	-0.842846	0.0500254
ENST00000398958	RCC1	-0.948356	0.00088848		ENST00000375377	KIAA1462	-0.843603	0.000310458
ENST00000454366	GTSE1	-0.950183	6.32e-05		ENST00000374403	KIF4A	-0.849066	0.00200151
ENST00000436336	CPSF4	-0.950381	0.0495411		ENST00000275517	CDCA5	-0.855135	0.00162934
ENST00000542398	DLG3	-0.951174	0.0296193		ENST00000376021	TEX30	-0.857071	0.0543227
ENST00000300093	PLK1	-0.95137	1.27e-08		ENST00000396682	RPA3	-0.859476	0.0266466
ENST00000274026	CCNA2	-0.952505	7.66e-05		ENST00000376687	SUV39H1	-0.865522	0.0135237
ENST00000428559	DERA	-0.952511	0.0409946		ENST00000600873	HNRNPL	-0.865926	7.82e-07
ENST00000350051	BIRC5	-0.957507	5.41e-07		ENST00000439211	DHFR	-0.868162	0.00152943
ENST00000323274	TYMS	-0.96021	0.00162217		ENST00000256319	C14orf1	-0.86991	0.0545801
ENST00000368325	CENPW	-0.963047	3.93e-05		ENST00000393375	TMEM126B	-0.87094	0.0291119
ENST00000361148	ZWINT	-0.97061	0.0464487		ENST00000258884	ABHD17C	-0.873541	0.00838399
ENST00000409687	SAPCD2	-0.983145	0.0373242		ENST00000312196	MSL3	-0.874456	0.0150291
ENST00000361729	E2F2	-0.99103	0.00271665		ENST00000230056	GMNN	-0.875784	0.00176646
ENST00000305784	DTYMK	-0.993223	0.00139809		ENST00000324913	CHCHD5	-0.882968	0.0356345
ENST00000369847	PCGF6	-0.995349	0.0390629		ENST00000312037	RPS14	-0.88492	0.0121001
ENST00000266085	TIMP3	-1.00055	1.46e-07		ENST00000388793	SRRT	-0.885059	0.0326523
ENST00000538311	MELK	-1.00546	0.0174508		ENST00000545390	VOPP1	-0.886792	0.0330464
ENST00000346528	RBM23	-1.00617	0.0133468		ENST00000394580	RPL36	-0.890095	0.000727129
ENST00000310613	SULT1B1	-1.00813	0.0510962		ENST00000260447	GCHFR	-0.890479	0.0287533
ENST00000217429	FAM83D	-1.01423	0.000303197		ENST00000392485	SRSF2	-0.906965	0.0275364
ENST00000371092	ITGB3BP	-1.0152	0.0270595		ENST00000359843	FOXM1	-0.908233	0.000875211
ENST00000269298	SAT2	-1.02213	0.0205108		ENST00000446327	SRSF7	-0.909712	0.00539843
ENST00000411486	HJURP	-1.02799	0.00465382		ENST00000584164	RPL26	-0.910579	0.0148836
ENST00000372654	NFYC	-1.03164	0.0213793		ENST00000301905	PBK	-0.916483	1.6e-06
ENST00000592540	SPC24	-1.03229	0.0018121		ENST00000592540	SPC24	-0.918441	0.00479518
ENST00000301905	PBK	-1.03601	8.8e-08		ENST00000375499	SDHB	-0.91972	0.0185608
ENST00000371975	RAD54L	-1.03674	0.0220703		ENST00000331890	FBXL6	-0.921724	0.0412744
ENST00000371485	CEP55	-1.03979	0.000273678		ENST00000460911	EZH2	-0.922806	0.00977688
ENST00000235382	RGS2	-1.05975	0.00136964		ENST00000392952	ABLIM1	-0.923862	0.0121562
ENST00000506380		-1.06539	0.0382493		ENST00000556840	MRPL52	-0.92476	0.021327
ENST00000439211	DHFR	-1.06547	0.000153369		ENST00000361627	ARHGAP11A	-0.92654	0.00890674
ENST00000395284	CDK1	-1.06788	3.7e-09		ENST00000454366	GTSE1	-0.928159	9.28e-05
ENST00000380026	CENPE	-1.08046	0.0351149		ENST00000371485	CEP55	-0.929451	0.000953754
ENST00000359692	DNM2	-1.09671	0.00206823		ENST00000314136	ANP32E	-0.929507	0.0103822
ENST00000396811	CBY1	-1.10738	0.0525768		ENST00000254521	HSD17B7	-0.929963	0.0508355
ENST00000369727	SFR1	-1.10809	0.0307323		ENST00000356455	UBE2C	-0.932289	5.86e-08
ENST00000372927	CENPI	-1.11008	0.0198098		ENST00000260363	KIF23	-0.934376	0.000763548
ENST00000248958	SDF2L1	-1.11807	0.00549213		ENST00000423485	TOP2A	-0.935784	4.8e-07
ENST00000379333	SLC23A2	-1.121	1.81e-06		ENST00000368107	DUSP23	-0.941652	0.0137483
ENST00000296503	HMGB2	-1.13249	0.0428293		ENST00000369764	OBFC1	-0.942487	0.00991911
ENST00000393456	GOSR2	-1.13312	0.0416024		ENST00000446922	HMGB2	-0.94264	1.11e-06
ENST00000368653	MKI67	-1.14692	3.34e-05		ENST00000264221	PAICS	-0.943976	0.00781037
ENST00000343090	UBE4B	-1.15144	0.0490484		ENST00000372927	CENPI	-0.950774	0.0410057
ENST00000535254	BUB1	-1.15618	0.0375417		ENST00000530167	H2AFX	-0.954324	1.53e-06
ENST00000348706	PPA2	-1.15866	0.014463		ENST00000265097	THOC3	-0.96	0.0546729
ENST00000327979	FAM65C	-1.1593	0.00821985		ENST00000367409	ASPM	-0.963254	0.00901584
ENST00000393929	CCNG1	-1.16281	0.0150071		ENST00000217429	FAM83D	-0.965353	0.000549791
ENST00000374454	PDZD11	-1.16359	0.0106257		ENST00000274065	RPS3A	-0.9681	0.0106859
ENST00000446327	SRSF7	-1.16662	0.000614522		ENST00000393860	RAB5C	-0.969166	0.0121133
ENST00000397066	CCNF	-1.16835	0.00861707		ENST00000347458	STAU1	-0.972549	0.0185311
ENST00000361951	DARS2	-1.16871	0.00205078		ENST00000338995	COMMD4	-0.974156	0.00178358
ENST00000338165	EME1	-1.16993	0.0130891		ENST00000395284	CDK1	-0.975872	5.28e-08
ENST00000268043	PIF1	-1.18466	0.0288955		ENST00000248958	SDF2L1	-0.975957	0.0134066
ENST00000341426	NADK	-1.19324	0.0507442		ENST00000585124	AURKB	-0.978109	0.000658489
ENST00000312841	HR	-1.19405	0.0407285		ENST00000305784	DTYMK	-0.979852	0.00164413
ENST00000367900	NUF2	-1.19683	0.000190145		ENST00000261881	TIPIN	-0.980394	0.00824583
ENST00000254521	HSD17B7	-1.20164	0.015635		ENST00000321394	TCP1	-0.986453	0.00119105
ENST00000356487	GPI	-1.20529	0.0540102		ENST00000306688	LRRC45	-0.997847	0.0208914
ENST00000380650	RPAP3	-1.20612	0.0303091		ENST00000579226	MYL12A	-1.00083	0.00013692
ENST00000233505	CENPA	-1.20706	0.00596177		ENST00000379643	MAP7D2	-1.00386	0.00181758
ENST00000394711	CLCA1	-1.20827	0.0225981		ENST00000504898	HNRNPAB	-1.0068	0.0088496
ENST00000369909	PSRC1	-1.21478	0.00749771		ENST00000374616	HNRNPR	-1.00745	0.0524268
ENST00000396276	CPVL	-1.22237	0.000905004		ENST00000380785	MID1	-1.01767	0.0457523
ENST00000349511	UBA3	-1.2289	0.0328251		ENST00000377213	LZIC	-1.0182	0.0179411
ENST00000352551	UBE2C	-1.23573	4.56e-07		ENST00000404032	TMEM214	-1.01934	0.0524601
ENST00000366669	COG2	-1.24163	0.0476562		ENST00000247655	COX7C	-1.02157	0.0203603
ENST00000541717	MELK	-1.24274	0.0293108		ENST00000328514	GINS3	-1.02425	0.0238236
ENST00000229266	CHPT1	-1.24501	0.039918		ENST00000414200	CCND3	-1.02698	0.0393763
ENST00000263974	TAF12	-1.24544	0.038498		ENST00000447382	IL1RAP	-1.02995	0.040196
ENST00000358130	HMGN5	-1.25287	0.00632114		ENST00000350051	BIRC5	-1.03238	9.66e-08
ENST00000456234	TARBP2	-1.25578	0.0495126		ENST00000527348	BANF1	-1.03715	0.0113477
ENST00000453996	CTU2	-1.26835	0.015477		ENST00000436439	HMGCL	-1.04797	0.0538611
ENST00000265036	DEPDC1B	-1.27253	0.00374819		ENST00000565874	CPNE2	-1.05124	0.0512759
ENST00000371269	DHCR24	-1.27562	9.82e-06		ENST00000373852	C20orf24	-1.0537	0.0149653
ENST00000372480	NTMT1	-1.28311	0.015392		ENST00000352551	UBE2C	-1.05622	1.14e-05
ENST00000372568	UBE2C	-1.28574	0.019231		ENST00000569554	SULT1A1	-1.06159	0.0310529
ENST00000239940	PFN2	-1.28599	0.032469		ENST00000372654	NFYC	-1.06614	0.0184964
ENST00000381685	NOL10	-1.29141	0.023951		ENST00000373944	ZWINT	-1.08966	0.0327455
ENST00000322886	E2F7	-1.29386	0.0426819		ENST00000411486	HJURP	-1.09365	0.00301665
ENST00000229758	FBXO5	-1.30395	0.000109819		ENST00000300093	PLK1	-1.09861	1.31e-10
ENST00000473706	CENPO	-1.31167	0.018631		ENST00000368653	MKI67	-1.10007	6.42e-05
ENST00000367409	ASPM	-1.32816	0.000690385		ENST00000579248	RPL17	-1.10115	0.0261438
ENST00000336458	EIF5A	-1.32827	0.0300458		ENST00000376582	TIMM17B	-1.1122	0.0422802
ENST00000290271	STC1	-1.33208	1.42e-05		ENST00000289166	FAM46B	-1.1155	0.00140069
ENST00000435644	RB1CC1	-1.3346	0.0233681		ENST00000449470	RPL9	-1.12279	0.0266675
ENST00000398944	EIF3CL	-1.33606	0.0198337		ENST00000554913	XRCC3	-1.13025	0.0359317
ENST00000398686	LOXHD1	-1.34541	0.0125428		ENST00000221466	FCGRT	-1.13699	0.022193
ENST00000332160	METTL7A	-1.35141	0.042239		ENST00000441778	LDB2	-1.14394	0.0168638
ENST00000596049	PIH1D1	-1.35554	0.0374644		ENST00000388837	KRT18	-1.15951	0.029052
ENST00000272521	TMEM177	-1.36596	0.0447372		ENST00000344795	C20orf24	-1.1598	0.00173639
ENST00000257934	ESPL1	-1.37827	0.00192144		ENST00000542398	DLG3	-1.16092	0.0107282
ENST00000264221	PAICS	-1.38583	0.000212722		ENST00000310613	SULT1B1	-1.16177	0.0291301
ENST00000381920	METTL22	-1.39177	0.0205601		ENST00000379333	SLC23A2	-1.16473	8.89e-07
ENST00000535366	ENO2	-1.40248	0.0492646		ENST00000380900	PSMG1	-1.167	0.0266367
ENST00000331890	FBXL6	-1.40544	0.00404644		ENST00000458578	UBE2L3	-1.16795	0.0546244
ENST00000408946	WIBG	-1.40606	0.05006		ENST00000369727	SFR1	-1.16903	0.0246116
ENST00000369903	PSRC1	-1.40757	0.0477478		ENST00000381941	FAM110A	-1.17101	0.0288445
ENST00000373832	RCC1	-1.41661	0.0200974		ENST00000318364	MRPL43	-1.17238	0.00566663
ENST00000405520	UBE2C	-1.41918	0.0361865		ENST00000397666	C16orf13	-1.18089	0.00123518
ENST00000376637	AGTRAP	-1.42281	0.0421898		ENST00000379519	YPEL5	-1.18337	0.0171021
ENST00000552402	C17orf49	-1.42375	0.0234579		ENST00000287598	BUB1B	-1.19486	8.09e-05
ENST00000373934	CDCA7L	-1.42555	0.00731555		ENST00000428559	DERA	-1.20557	0.0136022
ENST00000375050	PBX2	-1.43202	0.0547753		ENST00000369130	VPS45	-1.22102	0.0528563
ENST00000419421	PRR22	-1.43467	0.0391317		ENST00000520948	VEGFA	-1.22126	0.0127567
ENST00000287598	BUB1B	-1.44318	4.46e-06		ENST00000596655	C19orf48	-1.22673	0.00281568
ENST00000394818	INCENP	-1.44783	0.0374666		ENST00000257934	ESPL1	-1.22736	0.00473603
ENST00000258091	CCT7	-1.45372	0.0410617		ENST00000317096	PARL	-1.23134	0.00925092
ENST00000315273	ASAP2	-1.47675	0.0395343		ENST00000367900	NUF2	-1.23253	0.000140311
ENST00000405598	CHEK2	-1.47954	0.0515415		ENST00000374694	FZD8	-1.23746	0.00847856
ENST00000310053	HLTF	-1.50584	0.0319994		ENST00000362076	C1orf43	-1.25453	0.017679
ENST00000397505	MRPL52	-1.51354	0.050674		ENST00000589913	RPL27	-1.2645	0.00568828
ENST00000335574	HM13	-1.52024	0.047201		ENST00000399102	PIGP	-1.26926	0.021296
ENST00000243052	PDE1B	-1.5371	0.0224954		ENST00000521699	LY6E	-1.27129	0.0130604
ENST00000536987	MELK	-1.53754	0.0106907		ENST00000367393	C1orf53	-1.27516	0.0469451
ENST00000334100	AZI2	-1.54715	0.0472757		ENST00000235382	RGS2	-1.27872	0.000211225
ENST00000360476	NMB	-1.56814	0.00036479		ENST00000375887	TNFSF13B	-1.28275	2.62e-06
ENST00000552561	TMEM106C	-1.57479	0.00229532		ENST00000358130	HMGN5	-1.28675	0.00547112
ENST00000246100	FAM110A	-1.58135	0.0105855		ENST00000356657	FDPS	-1.28706	0.00424641
ENST00000336967	MYADM	-1.58919	0.0514489		ENST00000545668	DDX11	-1.28835	0.0112049
ENST00000240050	MTERFD3	-1.58933	0.0543188		ENST00000266085	TIMP3	-1.28843	2.74e-11
ENST00000454520	RACGAP1	-1.62723	0.00618969		ENST00000368809	S100A10	-1.29057	1.85e-05
ENST00000342308	TMEM230	-1.63498	0.0449816		ENST00000457143	ATP5J	-1.29244	0.00866438
ENST00000559239	PIF1	-1.63688	0.00779715		ENST00000394066	KLC2	-1.29872	0.0265939
ENST00000455915	RANGAP1	-1.64143	0.00788653		ENST00000322886	E2F7	-1.30153	0.0424986
ENST00000335539	PLA2G6	-1.64528	0.00581345		ENST00000371269	DHCR24	-1.30334	7.46e-06
ENST00000455934	NDUFS1	-1.65834	0.0230112		ENST00000394711	CLCA1	-1.30579	0.0157535
ENST00000400889	FAM72D	-1.66387	0.0466773		ENST00000494131	CYB5A	-1.31149	0.0139588
ENST00000253952	THOC6	-1.67466	0.0447227		ENST00000265036	DEPDC1B	-1.31988	0.00296779
ENST00000393278	MBD4	-1.69345	0.0196762		ENST00000283474	UBALD1	-1.33886	0.0332566
ENST00000343141	TBC1D7	-1.71397	0.028337		ENST00000429772	TMEM106C	-1.34311	0.00919116
ENST00000395607	SULT1A1	-1.72764	0.0232156		ENST00000397100	C7orf50	-1.34427	0.0244733
ENST00000276201	UPF3B	-1.73121	0.0365742		ENST00000335539	PLA2G6	-1.35423	0.0184932
ENST00000535419	PGRMC1	-1.73665	0.00285615		ENST00000360476	NMB	-1.35781	0.00143477
ENST00000583011	RPL26	-1.73823	0.000909833		ENST00000263578	FOXRED1	-1.36418	0.00433829
ENST00000379283	TMEM230	-1.74116	0.0251208		ENST00000293872	LUC7L	-1.36908	0.000742648
ENST00000397122	TEAD4	-1.74862	0.0364757		ENST00000243052	PDE1B	-1.37046	0.0371278
ENST00000282050	ATP5A1	-1.76357	0.0549924		ENST00000401959	NHP2L1	-1.38309	4.92e-05
ENST00000356350	HIST1H2BH	-1.77514	5.86e-06		ENST00000307877	SRP68	-1.40511	0.0374904
ENST00000368356	FDPS	-1.77685	2.18e-05		ENST00000442488	FEZF1	-1.40638	0.0540583
ENST00000295304	CHAC2	-1.7809	0.0230796		ENST00000433700	IFT74	-1.41527	0.0122005
ENST00000560747	NUSAP1	-1.78986	0.0549834		ENST00000435644	RB1CC1	-1.419	0.0177788
ENST00000395619	ARSA	-1.82173	0.0169026		ENST00000380393	PTPRA	-1.42204	0.0112445
ENST00000268138	TICRR	-1.83756	0.00410493		ENST00000481647	HN1	-1.42292	5.08e-06
ENST00000439817	MGEA5	-1.8483	0.0358983		ENST00000211314	TMEM14A	-1.42348	0.00247277
ENST00000489321	CREM	-1.89618	0.0196547		ENST00000473706	CENPO	-1.43291	0.0121251
ENST00000342071	MRPL43	-1.90137	0.0247808		ENST00000007264	RPUSD1	-1.4504	0.0479447
ENST00000411829	PIDD	-1.90509	0.041052		ENST00000360719	CPT1B	-1.46885	0.0504115
ENST00000456914	MUTYH	-1.90973	0.00869387		ENST00000332160	METTL7A	-1.47822	0.0302512
ENST00000374026	C6orf106	-1.93204	0.0455776		ENST00000433608	TTLL6	-1.48944	0.0539711
ENST00000226444	SULT1E1	-1.97192	0.00408385		ENST00000354989	ENTPD6	-1.48955	0.0215966
ENST00000348022	RBBP6	-1.97583	0.0394534		ENST00000370951	SRSF11	-1.5072	0.00738733
ENST00000329524	NFATC3	-1.99002	0.0272148		ENST00000568985	COQ7	-1.50792	0.0317213
ENST00000381120	MTIF3	-2.00634	0.000213436		ENST00000361648	ATP11C	-1.51049	0.000161298
ENST00000367186	SCAF8	-2.03198	0.00461455		ENST00000216455	PSMA3	-1.52547	0.0233836
ENST00000545008	MELK	-2.03839	0.0349937		ENST00000369909	PSRC1	-1.54058	0.00139818
ENST00000458578	UBE2L3	-2.04294	0.00357171		ENST00000545638	NCKAP1L	-1.54529	0.00236662
ENST00000504898	HNRNPAB	-2.0441	1.67e-06		ENST00000261479	PSMA6	-1.55894	0.0440584
ENST00000609810	HOXC4	-2.07196	0.0297415		ENST00000371740	SLC29A1	-1.56631	0.0104485
ENST00000379279	TMEM230	-2.08756	0.0168673		ENST00000402136	THAP4	-1.56651	0.00343208
ENST00000519548	TATDN1	-2.10286	0.000428011		ENST00000355057	HIST1H4J	-1.56933	0.00335694
ENST00000368273	PMF1	-2.10563	0.0359771		ENST00000344894	NDOR1	-1.58459	0.0141597
ENST00000431388	C17orf89	-2.1333	0.0464103		ENST00000518689	VEGFA	-1.59822	0.0511593
ENST00000508780	GLRX	-2.13516	0.0136911		ENST00000397122	TEAD4	-1.60095	0.0510362
ENST00000396027	XRCC4	-2.13615	0.0296657		ENST00000367866	POU2F1	-1.60707	0.0497972
ENST00000266077	SLC2A4RG	-2.16037	0.0077247		ENST00000325926	RPRM	-1.61905	0.0363142
ENST00000404569	MIEF1	-2.17857	0.0311229		ENST00000269305	TP53	-1.62379	0.00694625
ENST00000375305	FANCC	-2.18216	0.0338849		ENST00000356350	HIST1H2BH	-1.62594	2.26e-05
ENST00000401987	PPP1R7	-2.22532	0.00160686		ENST00000450966	USP40	-1.64316	0.0193154
ENST00000374171	POLE3	-2.26315	0.00482729		ENST00000357971	ACYP1	-1.66397	0.0103147
ENST00000559596	NUSAP1	-2.28277	0.0181982		ENST00000335574	HM13	-1.6644	0.0345648
ENST00000361815	PSMD10	-2.28657	0.0461686		ENST00000525815	SLC35F2	-1.66617	0.0189723
ENST00000367231	MTRF1L	-2.31478	0.0283171		ENST00000383678	GTPBP8	-1.67273	0.0535939
ENST00000351111	MRPL10	-2.31681	0.0148992		ENST00000583011	RPL26	-1.68643	0.00122741
ENST00000521988	TRIQK	-2.35471	0.0537363		ENST00000541490	RASSF8	-1.68865	0.054539
ENST00000528610	EEF1D	-2.35785	0.0401694		ENST00000327979	FAM65C	-1.73279	0.000360341
ENST00000395343	DIDO1	-2.37005	0.00502441		ENST00000366669	COG2	-1.7384	0.0110522
ENST00000374303	MTFR1L	-2.39356	0.0324784		ENST00000396276	CPVL	-1.7391	1.68e-05
ENST00000280362	PTS	-2.42577	0.00946743		ENST00000264935	CEP72	-1.79619	0.0423784
ENST00000426836	DSN1	-2.44231	0.000724292		ENST00000425597	SCAMP5	-1.80365	0.0134612
ENST00000359675	NDRG3	-2.45617	0.00148861		ENST00000541961	DPP3	-1.81834	0.0132898
ENST00000309357	AKIP1	-2.46816	0.0197063		ENST00000398606	GSTP1	-1.82351	0.0448045
ENST00000396602	ZNF143	-2.48756	0.0545207		ENST00000392541	ATP5G3	-1.82438	0.0387316
ENST00000373836	PHACTR4	-2.49573	0.00511693		ENST00000451378	NDUFAF3	-1.83006	0.0297176
ENST00000400796	TMEM51	-2.51989	0.0314005		ENST00000256857	GRP	-1.85457	0.000752572
ENST00000412398	CCDC51	-2.52296	0.00753831		ENST00000373836	PHACTR4	-1.86018	0.0212465
ENST00000544682	RNF182	-2.52379	0.0247092		ENST00000541717	MELK	-1.86285	0.0033815
ENST00000437685	CDC45	-2.53622	0.0226589		ENST00000409448	LYG1	-1.86331	0.0526789
ENST00000409470	USP39	-2.54507	0.00691206		ENST00000242786	CD97	-1.88104	0.0401752
ENST00000409357	NIF3L1	-2.54863	0.0327202		ENST00000347708	FAM203A	-1.88738	0.0511794
ENST00000356208	RBM38	-2.57325	0.0363136		ENST00000427851	SLC29A1	-1.89502	0.00404471
ENST00000554969	HNRNPC	-2.69369	0.0127923		ENST00000347941	PRDX5	-1.91548	0.0104417
ENST00000308108	CCNE2	-2.76875	0.0418108		ENST00000267584	AK7	-1.93161	0.0518391
ENST00000339737	NUDT1	-2.77341	4.6e-05		ENST00000266263	MTFP1	-1.94363	0.00342987
ENST00000580994	SLC25A19	-2.78466	0.0120051		ENST00000368738	S100A9	-1.94789	0.0151951
ENST00000592983	PIGW	-2.83662	0.0245555		ENST00000373247	FPGS	-1.96141	0.00726213
ENST00000382058	FBXO7	-2.87023	1.81e-06		ENST00000282050	ATP5A1	-1.97541	0.0382977
ENST00000368890	PIP5K1A	-2.87626	0.0230373		ENST00000357123	MCRS1	-2.00257	0.0124862
ENST00000427851	SLC29A1	-2.88521	0.000187299		ENST00000397914	CYB5A	-2.00859	4.92e-05
ENST00000358540	PTPN5	-2.92582	0.0317102		ENST00000268720	CPNE7	-2.01029	0.0469668
ENST00000423169	RAD51	-2.96665	0.0370122		ENST00000324767	SCAPER	-2.01447	0.0474845
ENST00000369130	VPS45	-3.02719	0.000342506		ENST00000409965	METTL5	-2.02719	0.0283206
ENST00000370872	CRYZ	-3.03094	0.0188582		ENST00000476858	APTX	-2.02786	0.00509773
ENST00000331531	SLC25A10	-3.03453	0.0532266		ENST00000374452	SRSF10	-2.03896	0.036144
ENST00000420027	UBE2V1	-3.0473	0.0520351		ENST00000423191	TOX2	-2.05508	0.0153296
ENST00000480820	RSRC1	-3.07804	0.0492408		ENST00000373934	CDCA7L	-2.05947	0.000525036
ENST00000389142	OS9	-3.08348	0.0487573		ENST00000322776	NDUFV1	-2.06819	0.0109702
ENST00000315266	GPHN	-3.18282	0.0404831		ENST00000448077	PPARD	-2.07017	0.0266582
ENST00000355717	TCF7L2	-3.18505	0.0403094		ENST00000397086	RNPS1	-2.0712	0.00910067
ENST00000225308	SLC25A39	-3.20001	0.0391565		ENST00000336458	EIF5A	-2.07258	0.0020915
ENST00000441687	HJURP	-3.21072	0.00307755		ENST00000268138	TICRR	-2.07297	0.00193088
ENST00000382110	TRAPPC12	-3.221	0.0375782		ENST00000589660	CIRBP	-2.09155	0.0370926
ENST00000366957	SMYD2	-3.22494	0.0293091		ENST00000462320	NFU1	-2.10345	0.00037901
ENST00000416858	SLC25A19	-3.23887	0.0362698		ENST00000589599	H3F3B	-2.11245	0.00270406
ENST00000529383	UBTF	-3.2517	0.00444254		ENST00000580865	GAS7	-2.1125	0.0441593
ENST00000381278	A4GALT	-3.25697	0.000217308		ENST00000399774	BID	-2.12559	0.00584963
ENST00000355196	SEC31A	-3.29439	0.00223367		ENST00000448905	HMGB3	-2.14354	0.00590204
ENST00000371731	SLC29A1	-3.30248	0.0318712		ENST00000316425	TMEM107	-2.16064	0.0506001
ENST00000303296	HIPK3	-3.30375	0.0317874		ENST00000422190	ATP2C1	-2.16746	0.0328268
ENST00000396234	IQGAP2	-3.32565	0.0303672		ENST00000411809	CLINT1	-2.17361	0.00440252
ENST00000339430	LITAF	-3.33138	0.0300027		ENST00000335997	ELF4	-2.1744	0.0141094
ENST00000440960	SLMO1	-3.3354	0.0297495		ENST00000272348	SNRPG	-2.17989	0.00155202
ENST00000409773	DYNC1I2	-3.37107	0.0275666		ENST00000355860	WWOX	-2.18674	0.0451955
ENST00000360423	SULT1A4	-3.38551	0.0267169		ENST00000312841	HR	-2.2316	0.00136971
ENST00000318109	DERL3	-3.39172	0.0166175		ENST00000396207	MGST1	-2.24092	0.0227894
ENST00000559836	GMPR2	-3.40949	0.0253475		ENST00000540265	PGM1	-2.24857	0.0481228
ENST00000402092	2014-09-02	-3.42039	0.0247422		ENST00000361400	ST3GAL3	-2.25986	0.000715862
ENST00000354532	ARHGEF1	-3.47655	0.0217886		ENST00000366733	MRPL55	-2.29072	0.00356531
ENST00000395827	TRABD	-3.49874	0.00156558		ENST00000582556	RPL26	-2.29508	0.00771076
ENST00000374618	ZNF33A	-3.51201	0.0200622		ENST00000262288	SCPEP1	-2.32635	0.0361731
ENST00000411793	HSD11B1L	-3.53277	0.0190998		ENST00000536987	MELK	-2.32793	0.000469393
ENST00000370138	LRRC39	-3.53752	0.0188846		ENST00000394818	INCENP	-2.343	0.00381374
ENST00000355057	HIST1H4J	-3.56373	1.34e-06		ENST00000380575	ELN	-2.37592	6.48e-05
ENST00000345383	TTC8	-3.57833	0.0171086		ENST00000538975	CLUH	-2.38748	0.0163932
ENST00000013034	NME1	-3.57866	0.0170947		ENST00000290271	STC1	-2.39479	2.49e-11
ENST00000441199	VMO1	-3.58377	0.0168816		ENST00000396811	CBY1	-2.40778	0.000734655
ENST00000556618	RCCD1	-3.58578	0.0187485		ENST00000331380	HIST2H2AC	-2.42159	0.0493787
ENST00000519969	TRIQK	-3.61566	0.0155962		ENST00000329994	SLC52A2	-2.42359	0.0383953
ENST00000374446	ZNF239	-3.61617	0.0155762		ENST00000596049	PIH1D1	-2.42808	0.00188685
ENST00000379567	AP5S1	-3.62606	0.000399017		ENST00000330333	BACE2	-2.43204	0.0274619
ENST00000381394	MBD3L4	-3.63943	0.0155733		ENST00000408982	RABEP1	-2.43593	0.011691
ENST00000453295	OSBPL9	-3.67724	0.0133248		ENST00000253952	THOC6	-2.44346	0.00995807
ENST00000586590	TMEM205	-3.68508	0.0130547		ENST00000482202	TMUB1	-2.45899	0.000686604
ENST00000407144	CUEDC1	-3.7536	0.0108689		ENST00000544682	RNF182	-2.46714	0.0274374
ENST00000427575	DOHH	-3.80409	0.00944785		ENST00000334656	C14orf80	-2.47449	0.0237066
ENST00000309615	APTX	-3.80817	0.000876974		ENST00000396063	GTF2A2	-2.49046	0.0460195
ENST00000455264	PAM	-3.84184	0.00848341		ENST00000518029	NAT1	-2.51126	0.043958
ENST00000500692	GNPDA1	-3.85303	0.00877086		ENST00000439647	AP2M1	-2.5253	0.0203826
ENST00000562255	PINLYP	-3.88167	0.00755109		ENST00000357207	TRAPPC11	-2.52884	0.0154405
ENST00000375341	ALDH4A1	-3.95796	0.00599209		ENST00000472745	TCEAL4	-2.5391	0.0232017
ENST00000242872	CENPK	-3.96571	0.00584926		ENST00000379307	TBC1D7	-2.54092	0.0347638
ENST00000416307	VMO1	-3.98583	0.00549117		ENST00000370228	C10orf2	-2.56624	0.0535612
ENST00000443024	IARS	-3.98927	0.0156302		ENST00000341191	ZNF823	-2.56952	0.0468002
ENST00000535822	ZNF133	-4.09506	0.00697527		ENST00000370322	NDUFB8	-2.6048	0.025654
ENST00000335183	CDKN3	-4.14784	0.011452		ENST00000371935	REXO4	-2.64085	0.00841186
ENST00000372999	TOX2	-4.24607	0.00224602		ENST00000360190	CDK5RAP2	-2.68541	0.0200074
ENST00000358029	STX16	-4.25256	0.00597024		ENST00000548489	TGIF1	-2.726	0.0114464
ENST00000505473	CDK10	-4.33408	0.00399295		ENST00000328739	VMO1	-2.73855	0.0323409
ENST00000446936	CNBP	-4.33527	0.00781168		ENST00000397995	RNASE4	-2.74148	0.0389896
ENST00000227618	ANAPC15	-4.34413	0.00154015		ENST00000455934	NDUFS1	-2.74187	0.00170352
ENST00000307114	GTPBP2	-4.34832	0.00151473		ENST00000331483	P4HB	-2.76284	0.0186618
ENST00000398422	CCT7	-4.35631	0.00540999		ENST00000226444	SULT1E1	-2.83716	0.000354303
ENST00000380469	VPS16	-4.39425	0.00125828		ENST00000246100	FAM110A	-2.85446	0.000195983
ENST00000433922	BZW2	-4.56251	0.000607233		ENST00000402965	SLC52A2	-2.89496	0.0505851
ENST00000451119	ZNF219	-4.56294	0.00246836		ENST00000445556	XRCC3	-2.90649	0.0494205
ENST00000369315	CASP7	-4.71862	0.000409668		ENST00000339145	IFI6	-2.93004	0.00776441
ENST00000419821	TAOK3	-4.76864	0.000221601		ENST00000432932	SRRT	-2.94149	2.93e-05
ENST00000510818	MOCS2	-4.89759	0.000676864		ENST00000339812	HIST1H2BJ	-3.00372	0.0148219
ENST00000555238	NUMB	-4.92434	0.00107647		ENST00000418781	ERMARD	-3.03353	0.0051728
ENST00000446179	IDH1	-4.94482	0.000116129		ENST00000225308	SLC25A39	-3.04019	0.0505324
ENST00000374583	PJA1	-5.04967	0.000295927		ENST00000380790	YAF2	-3.04097	0.0537217
ENST00000572639	ANAPC11	-5.18069	0.000432677		ENST00000420027	UBE2V1	-3.0473	0.0531256
ENST00000356708	ATP5C1	-5.24749	0.000743672		ENST00000473939	ORAI2	-3.07295	0.0507571
ENST00000394223	NDUFC1	-6.19713	4.93e-09		ENST00000480820	RSRC1	-3.07804	0.0502949
					ENST00000318316	DNASE1L3	-3.13203	0.0513809
					ENST00000548577	RNASEK	-3.15876	0.0433504
					ENST00000315266	GPHN	-3.18282	0.0414147
					ENST00000340296	DYNC1I2	-3.20284	0.00734201
					ENST00000340993	TUBD1	-3.22152	0.0384267
					ENST00000437642	MMP2	-3.23631	0.0373251
					ENST00000313639	FZR1	-3.2507	0.00427914
					ENST00000372236	POLH	-3.25652	0.0107223
					ENST00000375645	ATP11A	-3.25673	0.0358416
					ENST00000358577	MICAL1	-3.27801	0.0343392
					ENST00000380469	VPS16	-3.30403	0.00569442
					ENST00000542957	KLF6	-3.32011	0.0314989
					ENST00000339430	LITAF	-3.33138	0.0307677
					ENST00000264883	NUP54	-3.33373	0.0229533
					ENST00000531166	CASP1	-3.3669	0.0285427
					ENST00000588742	ZNF226	-3.40642	0.026205
					ENST00000559836	GMPR2	-3.40949	0.0260295
					ENST00000402092	2014-09-02	-3.42039	0.0254129
					ENST00000357271	GRB10	-3.44575	0.00654775
					ENST00000340437	CPSF7	-3.45665	0.0234379
					ENST00000354532	ARHGEF1	-3.47655	0.0224025
					ENST00000542824	ELP2	-3.48309	0.0220697
					ENST00000398686	LOXHD1	-3.50354	5.65e-06
					ENST00000381626	NT5C3A	-3.53045	0.0197672
					ENST00000411793	HSD11B1L	-3.53277	0.0196593
					ENST00000549478	C12orf73	-3.54429	0.0191293
					ENST00000445726	FAM219A	-3.5692	0.0180199
					ENST00000423169	RAD51	-3.57008	0.0179816
					ENST00000345383	TTC8	-3.57833	0.0176257
					ENST00000333151	HIST1H2AJ	-3.58671	0.0172693
					ENST00000396777	ARFIP2	-3.59154	0.0179187
					ENST00000591397	ATF7	-3.59158	0.0170647
					ENST00000532743	RAD51	-3.60321	0.0168903
					ENST00000519969	TRIQK	-3.61566	0.0160799
					ENST00000374446	ZNF239	-3.61617	0.0160594
					ENST00000563788	YPEL3	-3.64766	0.0148381
					ENST00000586590	TMEM205	-3.68508	0.0134793
					ENST00000358540	PTPN5	-3.72148	0.0122506
					ENST00000268043	PIF1	-3.76454	1.29e-06
					ENST00000596304	UBA52	-3.79425	0.0100533
					ENST00000318109	DERL3	-3.79631	0.00999592
					ENST00000292538	CUX1	-3.83137	0.0090573
					ENST00000562255	PINLYP	-3.88167	0.00783239
					ENST00000528610	EEF1D	-4.04097	0.00479028
					ENST00000451119	ZNF219	-4.09378	0.00480042
					ENST00000437685	CDC45	-4.23851	0.00242026
					ENST00000253669	HAUS8	-4.28067	0.00370177
					ENST00000307114	GTPBP2	-4.34832	0.00159268
					ENST00000367054	SOD2	-4.39518	0.00132008
					ENST00000431388	C17orf89	-4.47328	0.00114752
					ENST00000555593	TIMM9	-4.48578	0.00208584
					ENST00000433922	BZW2	-4.56251	0.00064351
					ENST00000476080	MED22	-4.60033	0.000541011
					ENST00000441687	HJURP	-4.65725	0.000413333
					ENST00000398422	CCT7	-4.71605	0.00345401
					ENST00000398409	CST3	-4.73337	0.0025541
					ENST00000555238	NUMB	-4.92434	0.00112626
					ENST00000586607	H3F3B	-4.97926	0.000645172
					ENST00000572639	ANAPC11	-5.18069	0.000455312
					ENST00000359675	NDRG3	-5.34989	6.05e-06
					ENST00000361815	PSMD10	-5.36675	0.000642506
					ENST00000382058	FBXO7	-5.53098	8.15e-10
					ENST00000544379	TOMM5	-5.96448	3.64e-05
					ENST00000394223	NDUFC1	-6.19713	5.76e-09
