# Supplementary material for: Activation of Wnt/β-Catenin in Ewing Sarcoma Cells Antagonizes EWS/ETS Function and Promotes Phenotypic Transition to More Metastatic Cell States
Source: Oxford University Press journal article supplement (doi:10.1158/0008-5472.can-15-3422), 2016-06-30
Supplement: 00085472can153422-sup-159677_1_supp_3515784_5755xd.xlsx [file 00085472can153422-sup-159677_1_supp_3515784_5755xd.xlsx]

## Sheet: Sheet1
Supplementary Table S2. Primer sequences used for qRT-PCR
Gene	Forward primer sequence	Reverse primer sequence
AXIN2	AAGTGCAAACTTTCGCCAAC	ACAGGATCGCTCCTCTTGAA
CCND1	CCGTCCATGCGGAAGATC	ATGGCCAGCGGGAAGAC
CD44	GACAAGTTTTGGTGGCACG	CACGTGGAATACACCTGCAA
CDC25A	CCAGCCCCAAAGAGTCAAC	AAGGTCCCTTGGGTCATTGT
CMYC	CGTAGTTGTGCTGATGTGTGG	CTCGGATTCTCTGCTCTCCTC
EWS/FLI1	CGACTAGTTATGATCAGAGCAGT	CCGTTGCTCTGTATTCTTACTGA
EPHB2	CTCTACTGTAACGGGGACGG	CCTTGAAAGTCCCAGATGGA
HPRT1	TGACACTGGCAAAACAATGCA	GGTCCTTTTCACCAGCAAGCT
ID2	GACAGCAAAGCACTGTGTGG	TCAGCACTTAAAAGATTCCGTG
LEF1	TGGATCTCTTTCTCCACCCA	CACTGTAAGTGATGAGGGGG
NKD1	TCGCCGGGATAGAAAACTACA	CAGTTCTGACTTCTGGGCCAC
NR0B1	AGCACAAATCAAGCGCAGG	GAAGCGCAGCGTCTTCAAC
TNC	GCAGCTCCACACTCCAGGTA	TTCAGCAGAATTGGGGATTT
